# Supplementary material
Source: PubMed Central journal article supplement (PMC6474802)
Supplement: NIHMS1018938-supplement-Supporting_Information.pdf [file NIHMS1018938-supplement-Supporting_Information.pdf]

Supporting information for

**Onydecalsins, Fungal Polyketides with Anti-*Histoplasma* and Anti-TRP Activity**

Zhenjian Lin,<sup>†</sup> Sujal Phadke,<sup>‡</sup> Zhenyu Lu,<sup>§</sup> Sinem Beyhan,<sup>‡</sup> May H. Abdel Aziz,<sup>§</sup> Chris Reilly,<sup>§</sup> Eric W. Schmidt<sup>\*,†</sup>

<sup>†</sup>Department of Medicinal Chemistry, University of Utah, Salt Lake City, UT 84112

<sup>‡</sup>Department of Infectious Diseases, J. Craig Venter Institute, La Jolla, CA 92037

<sup>§</sup>Department of Pharmacology & Toxicology, University of Utah, Salt Lake City, UT 84112

### List of the supporting information.

Figure S1.  $^1\text{H}$  NMR spectrum of compound **1** in  $\text{DMSO-}d_6$ .

Figure S2. HSQC of compound **1** in  $\text{DMSO-}d_6$ .

Figure S3. HMBC of compound **1** in  $\text{DMSO-}d_6$ .

Figure S4.  $^1\text{H-}^1\text{H}$  COSY of compound **1** in  $\text{DMSO-}d_6$ .

Figure S5. ROESY of compound **1** in  $\text{DMSO-}d_6$ .

Figure S6.  $^1\text{H}$  NMR of TFA salt of compound **1** in  $\text{DMSO-}d_6$ .

Figure S7.  $^{13}\text{C}$  NMR of TFA salt of compound **1** in  $\text{DMSO-}d_6$ .

Figure S8. HSQC of TFA salt of compound **1** in  $\text{DMSO-}d_6$ .

Figure S9. HMBC of TFA salt of compound **1** in  $\text{DMSO-}d_6$ .

Figure S10. COSY of TFA salt of compound **1** in  $\text{DMSO-}d_6$ .

Figure S11.  $^1\text{H}$  NMR of compound **2** in  $\text{DMSO-}d_6$ .

Figure S12.  $^{13}\text{C}$  NMR of compound **2** in  $\text{DMSO-}d_6$ .

Figure S13. HSQC of compound **2** in  $\text{DMSO-}d_6$ .

Figure S14.  $^1\text{H-}^1\text{H}$  COSY of compound **2** in  $\text{DMSO-}d_6$ .

Figure S15. ROESY of compound **2** in  $\text{DMSO-}d_6$ .

Figure S16.  $^1\text{H}$  NMR of compound **3** in  $\text{CDCl}_3$ .

Figure S17.  $^{13}\text{C}$  NMR of compound **3** in  $\text{CDCl}_3$ .

Figure S18. HSQC of compound **3** in  $\text{CDCl}_3$ .

Figure S19. HMBC of compound **3** in  $\text{CDCl}_3$ .

Figure S20.  $^1\text{H}$ - $^1\text{H}$  COSY of compound **3** in  $\text{CDCl}_3$ .

Figure S21. NOESY of compound **3** in  $\text{CDCl}_3$ .

Figure S22.  $^1\text{H}$  NMR of compound **4** in  $\text{CDCl}_3$ .

Figure S23.  $^{13}\text{C}$  NMR of compound **4** in  $\text{CDCl}_3$ .

Figure S24. HSQC of compound **4** in  $\text{CDCl}_3$ .

Figure S25. HMBC of compound **4** in  $\text{CDCl}_3$ .

Figure S26.  $^1\text{H}$ - $^1\text{H}$  COSY of compound **4** in  $\text{CDCl}_3$ .

Figure S27. NOESY of compound **4** in  $\text{CDCl}_3$ .

Figure S28. ADEQUATE spectrum of  $^{13}\text{C}$  labeled compound **1** in  $\text{DMSO}-d_6$ .

Figure S29. The  $^1\text{H}$  NMR of  $^{13}\text{C}$  labeled and natural compound **1**.

Figure S30. The  $^{13}\text{C}$  NMR of  $^{13}\text{C}$  labeled and natural compound **1**.

Figure S31. CD spectrum of compound **1**

Figure S32. CD spectrum of compound **2**

Figure S33. CD spectrum of compound **3**

Figure S34. CD spectrum of compound **4**

Figure S35. Dose response of TRPV channel inhibition.

Figure S36. Effects of onydecalins on *H. capsulatum* growth.

Figure S37. Effects of onydecalins on fungal growth

Table S1. Antagonist activity of compounds **1-4** against a panel of TRP channel.

Scheme S1. Proposed biogenesis of compound **1-4**. Red:  $^{13}\text{C}$ - $^{13}\text{C}$  coupled carbons resulting from feeding with  $\text{U-}^{13}\text{C}$ -glucose. Squares:  $^{13}\text{C}$ -enriched carbons resulting from feeding with  $\text{U-}^{13}\text{C}$ -glucose.

Figure S1.  $^1\text{H}$  NMR spectrum of compound **1** in  $\text{DMSO-}d_6$ .

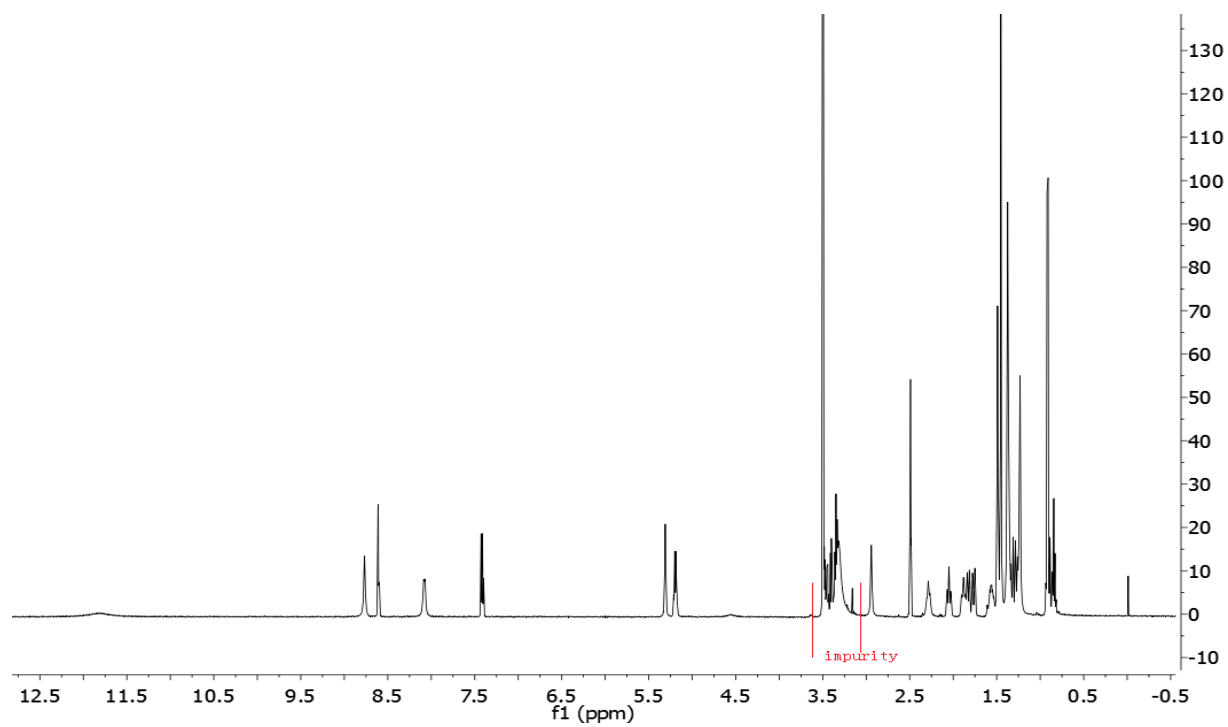

Figure S2. HSQC of compound **1** in  $\text{DMSO-}d_6$ .

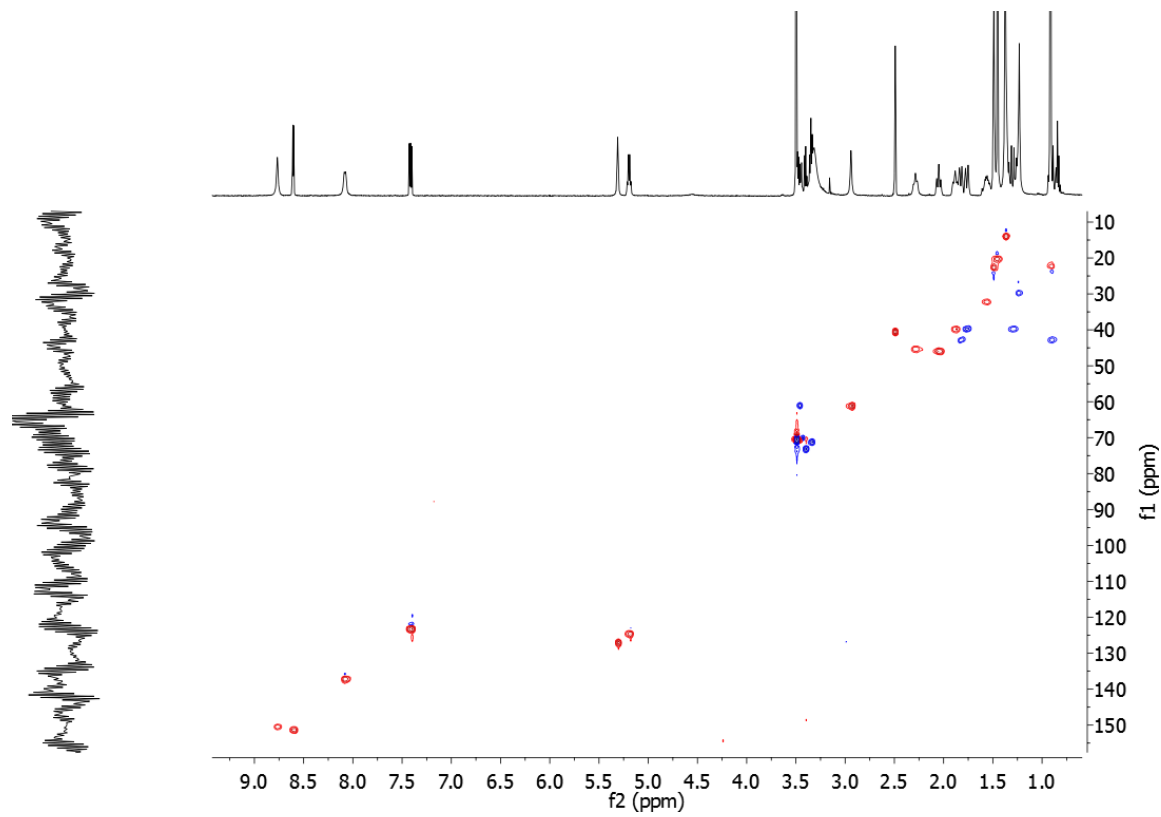

Figure S3. HMBC of compound **1** in DMSO- $d_6$ .

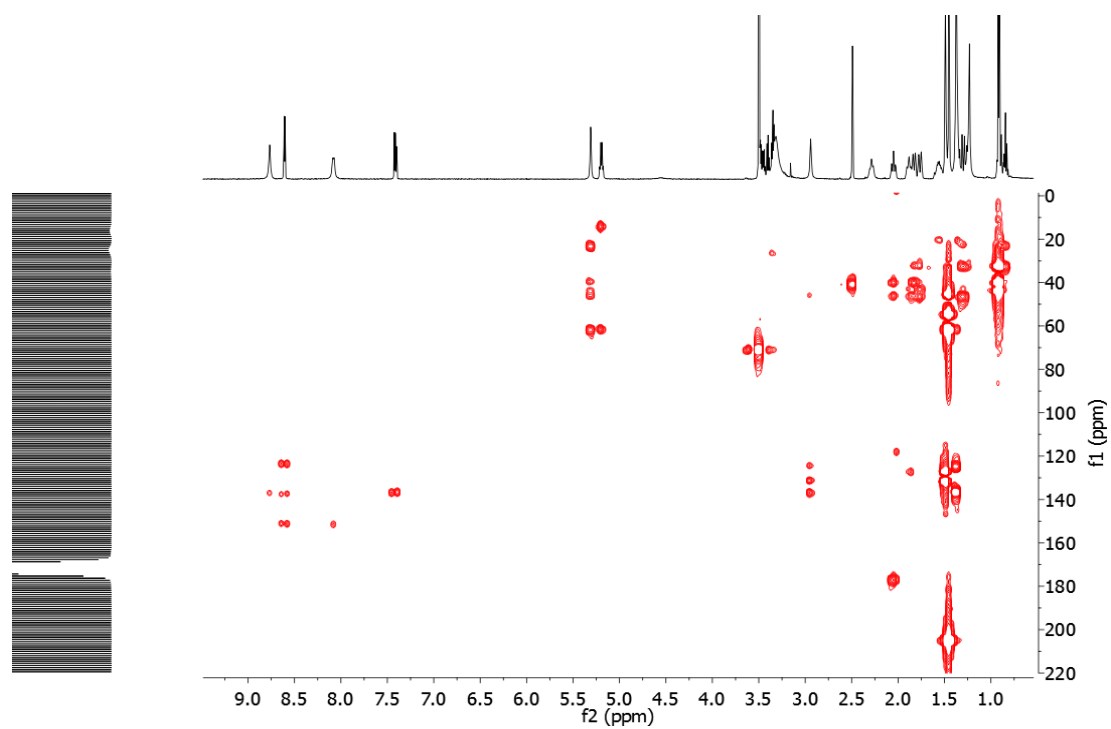

Figure S4.  $^1\text{H}$ - $^1\text{H}$  COSY of compound **1** in DMSO- $d_6$ .

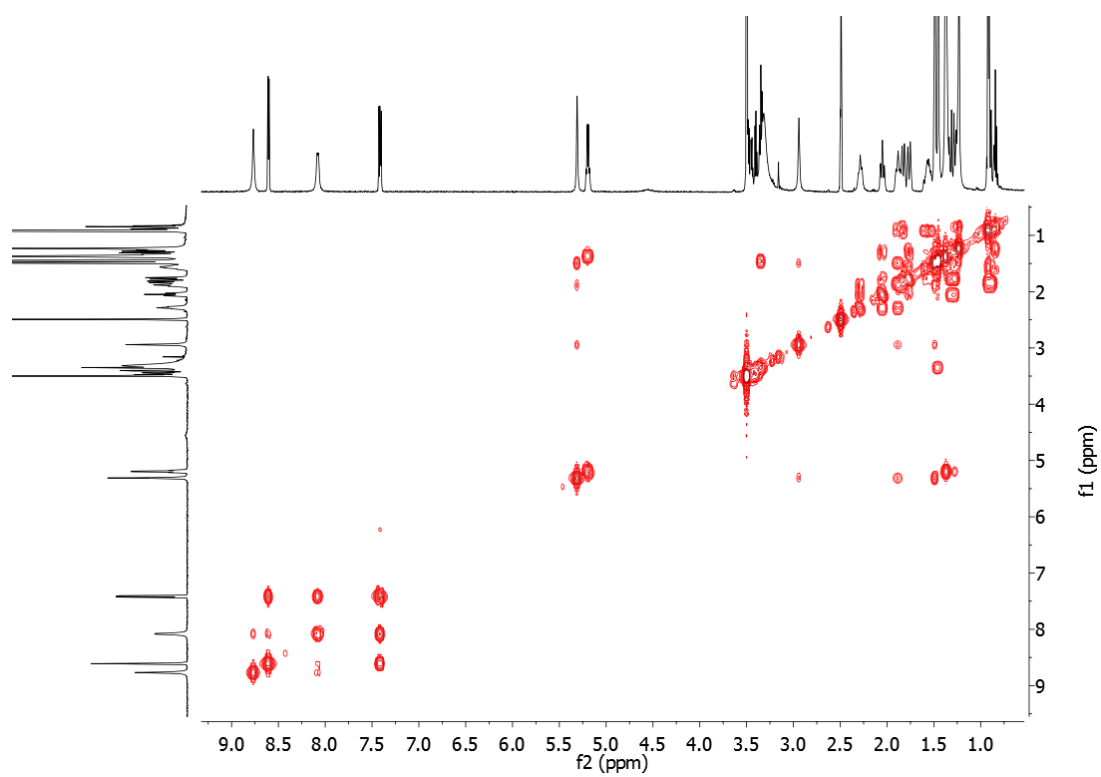

Figure S5. ROESY of compound **1** in DMSO-*d*<sub>6</sub>.

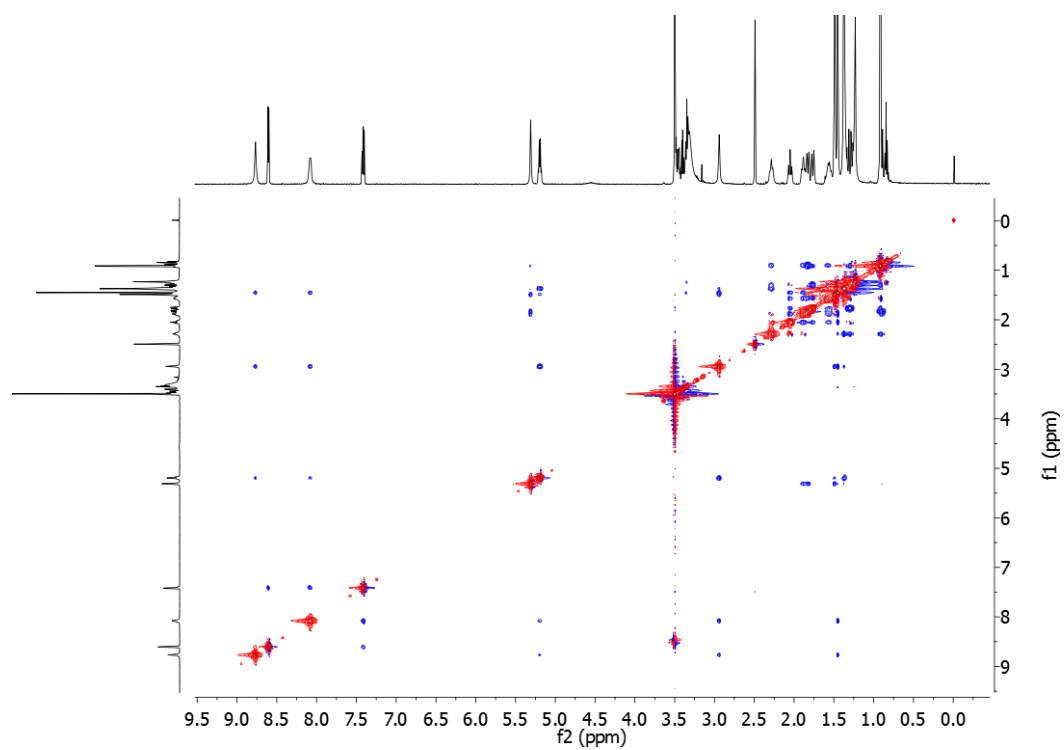

Figure S6. <sup>1</sup>H NMR of TFA salt of compound **1** in DMSO-*d*<sub>6</sub>.

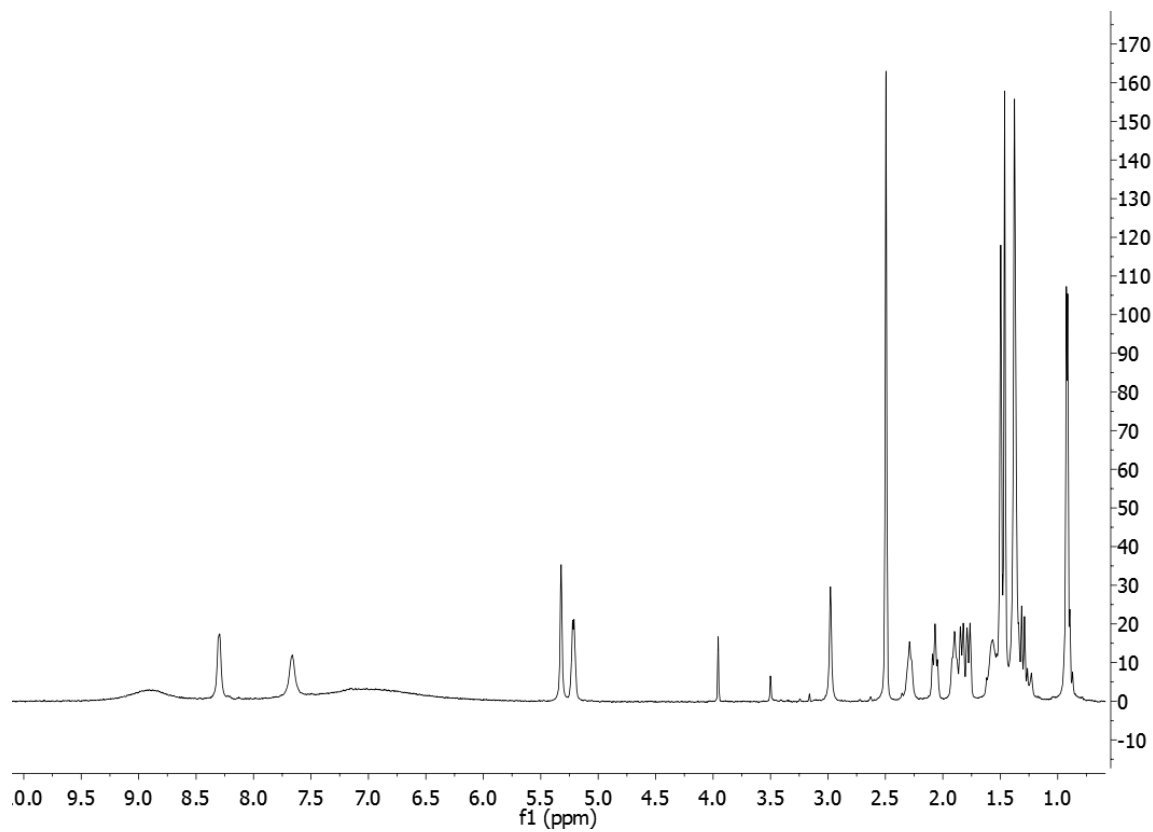

Figure S7.  $^{13}\text{C}$  NMR of TFA salt of compound **1** in  $\text{DMSO-}d_6$ .

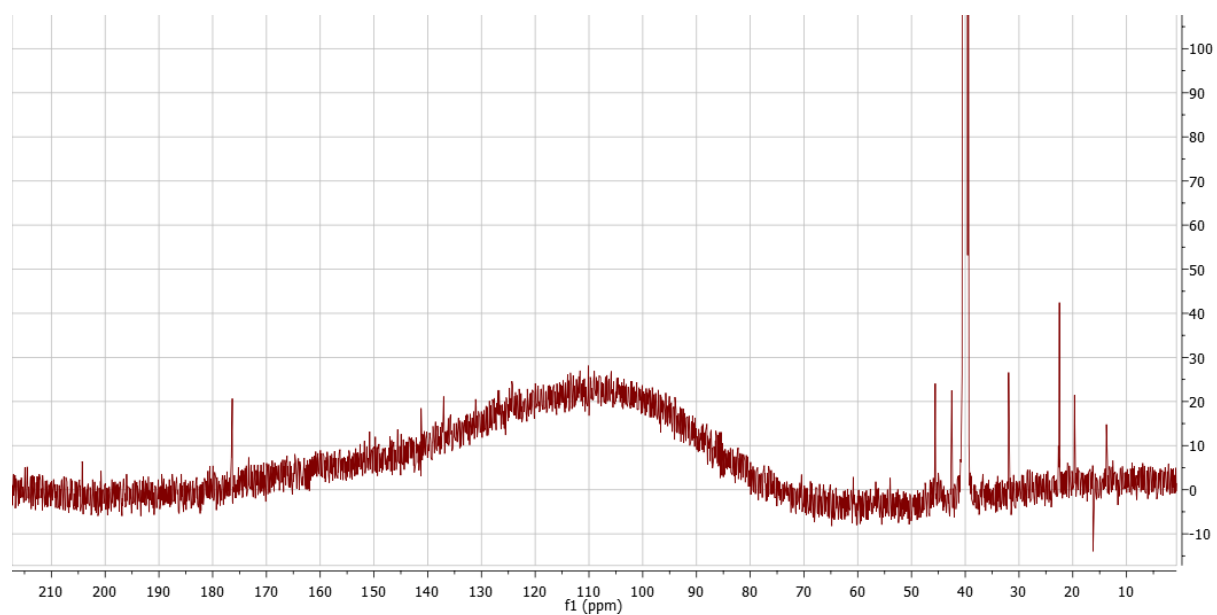

Figure S8. HSQC of TFA salt of compound **1** in  $\text{DMSO-}d_6$ .

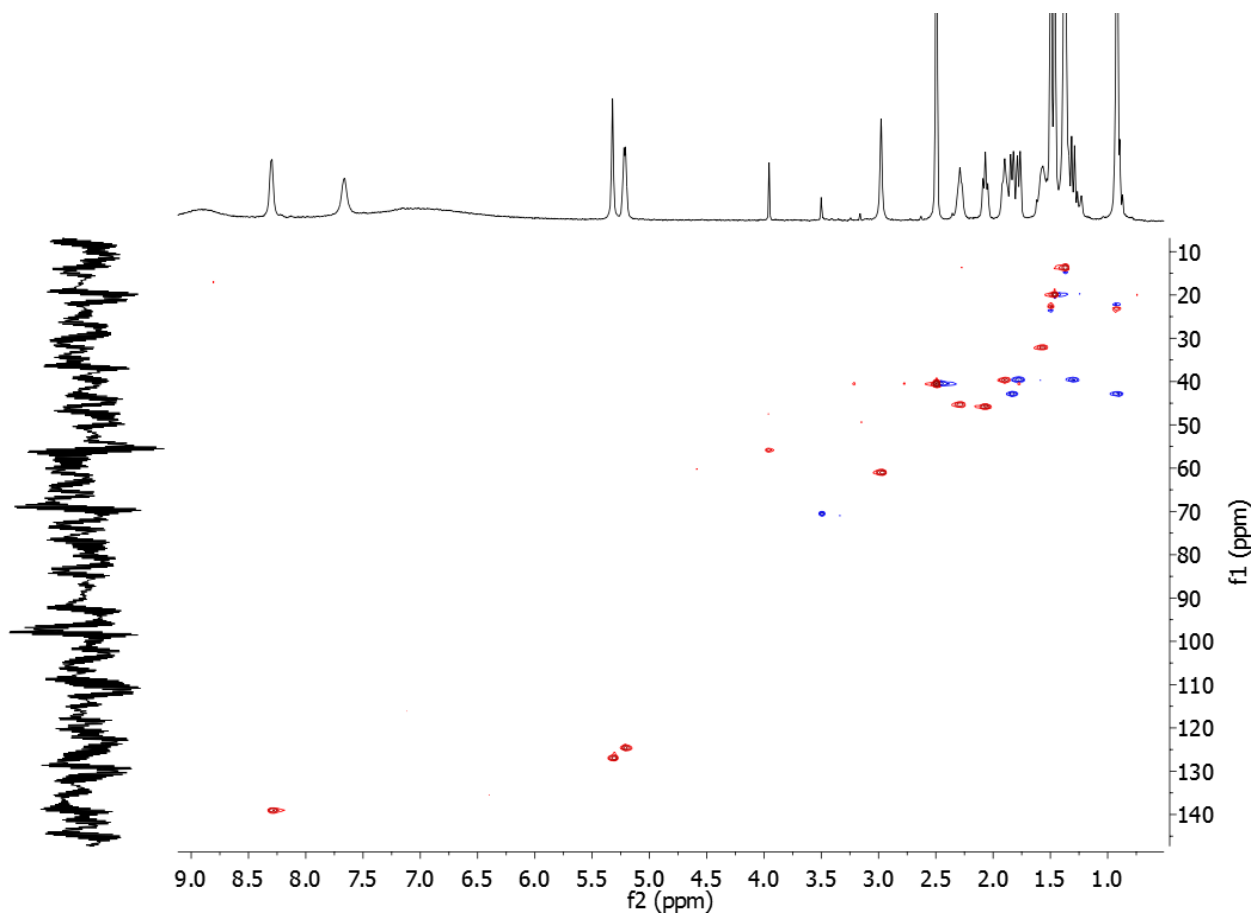

Figure S9. HMBC of TFA salt of compound **1** in DMSO-*d*<sub>6</sub>.

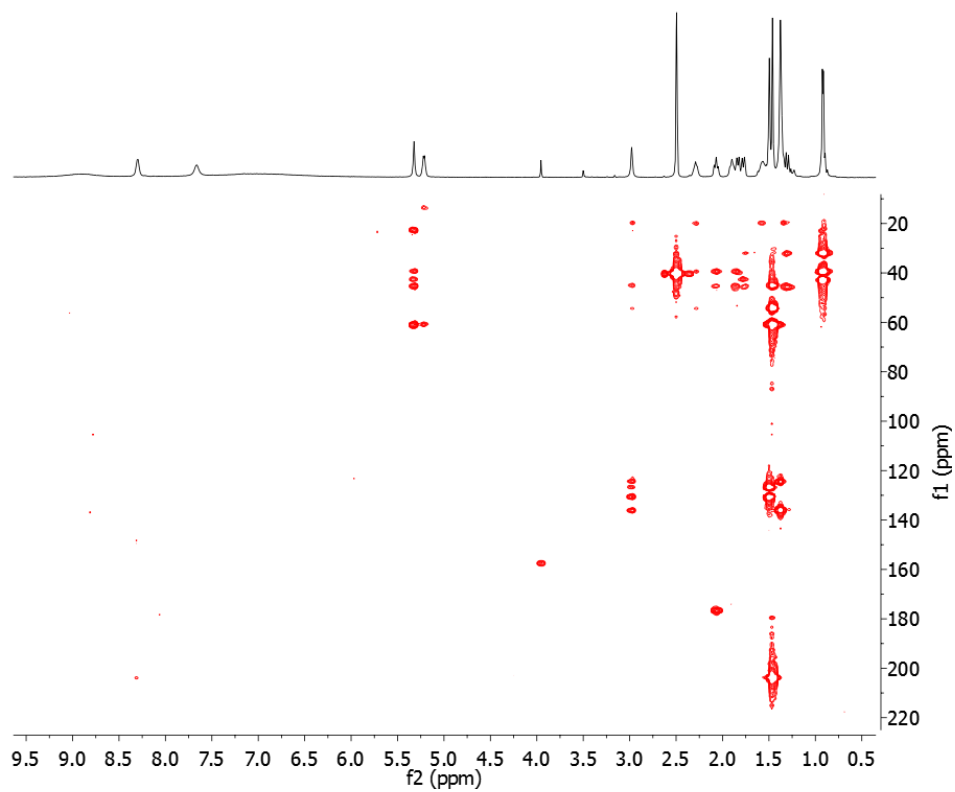

Figure S10. COSY of TFA salt of compound **1** in DMSO-*d*<sub>6</sub>.

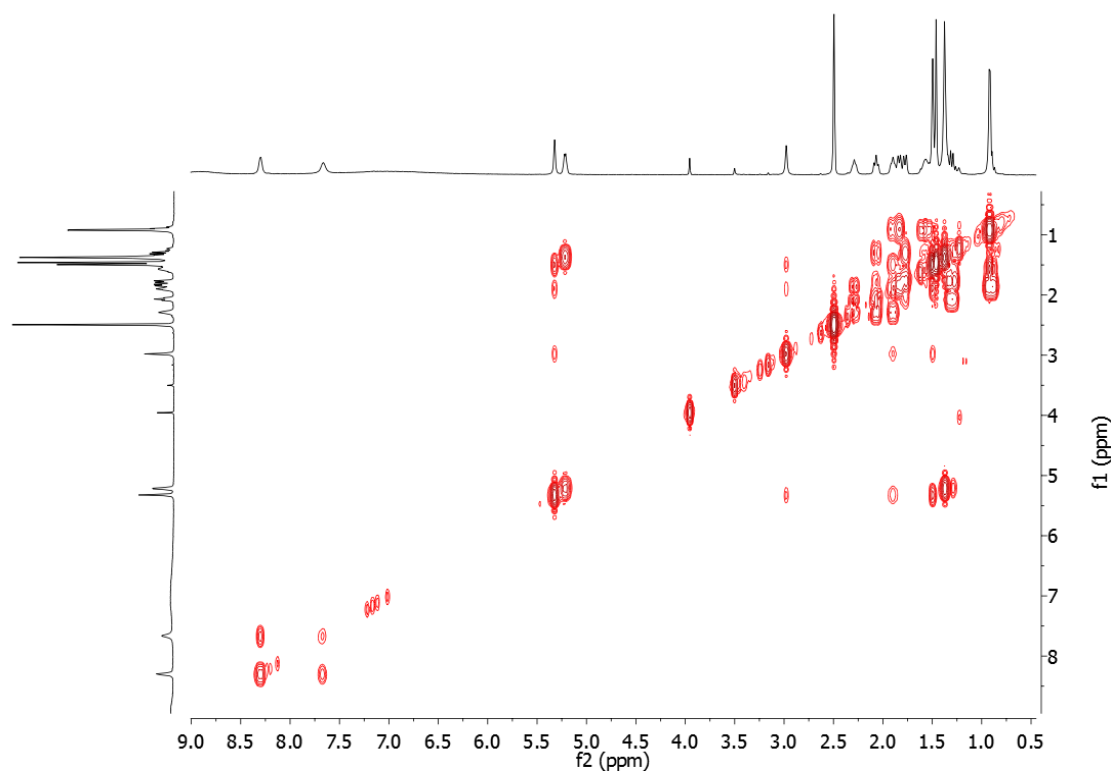



Figure S11.  $^1\text{H}$  NMR of compound **2** in  $\text{DMSO-}d_6$ .

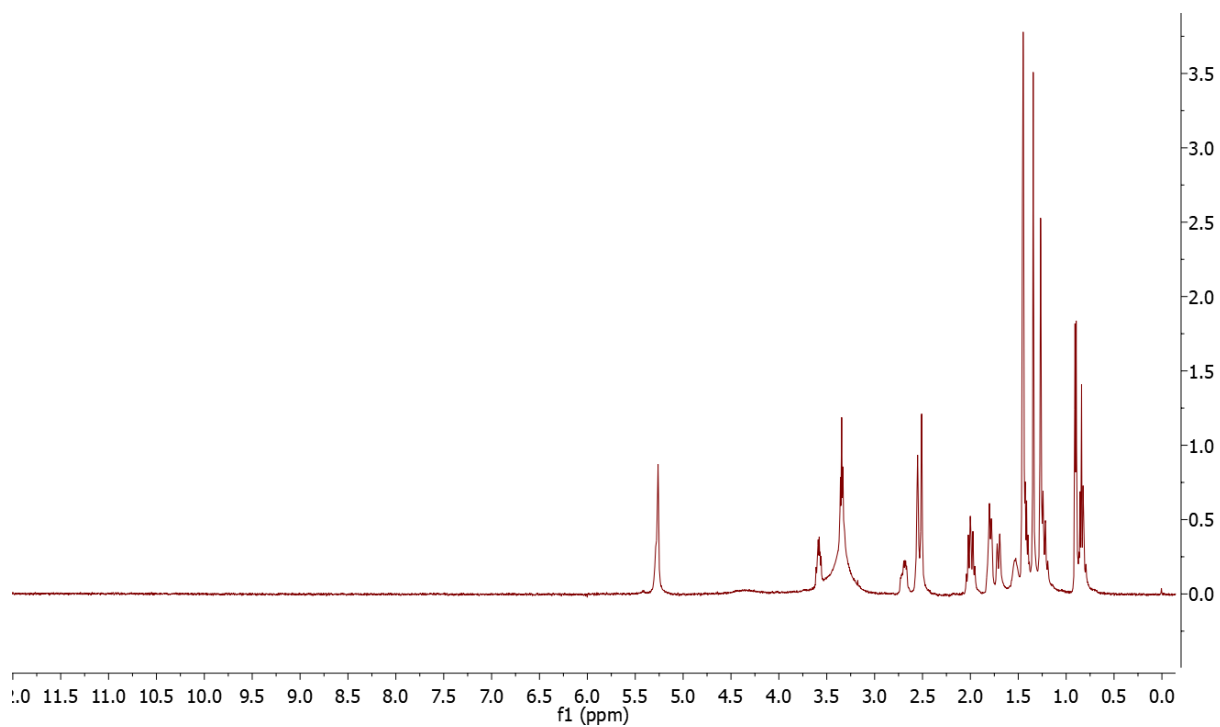

Figure S12.  $^{13}\text{C}$  NMR of compound **2** in  $\text{DMSO-}d_6$ .

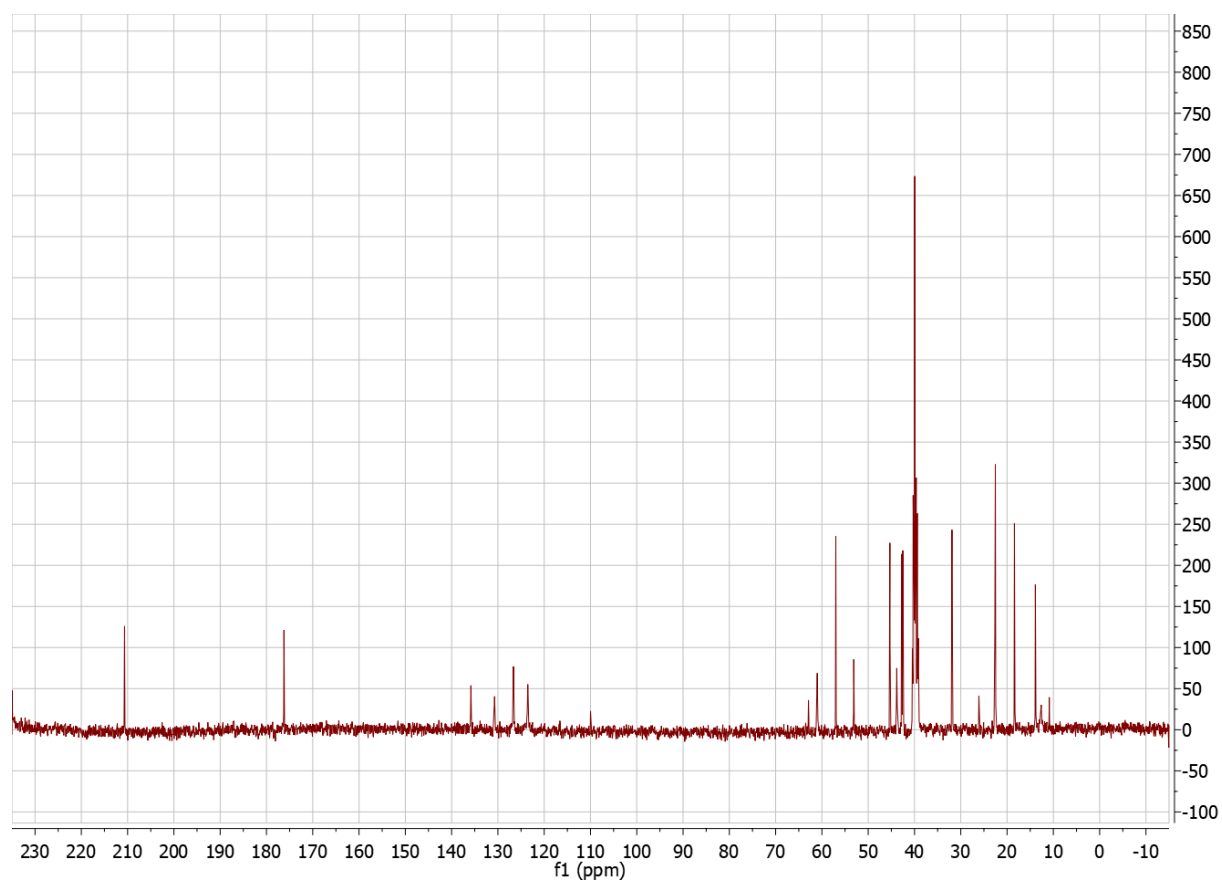

Figure S13. HSQC of compound **2** in DMSO-*d*<sub>6</sub>.

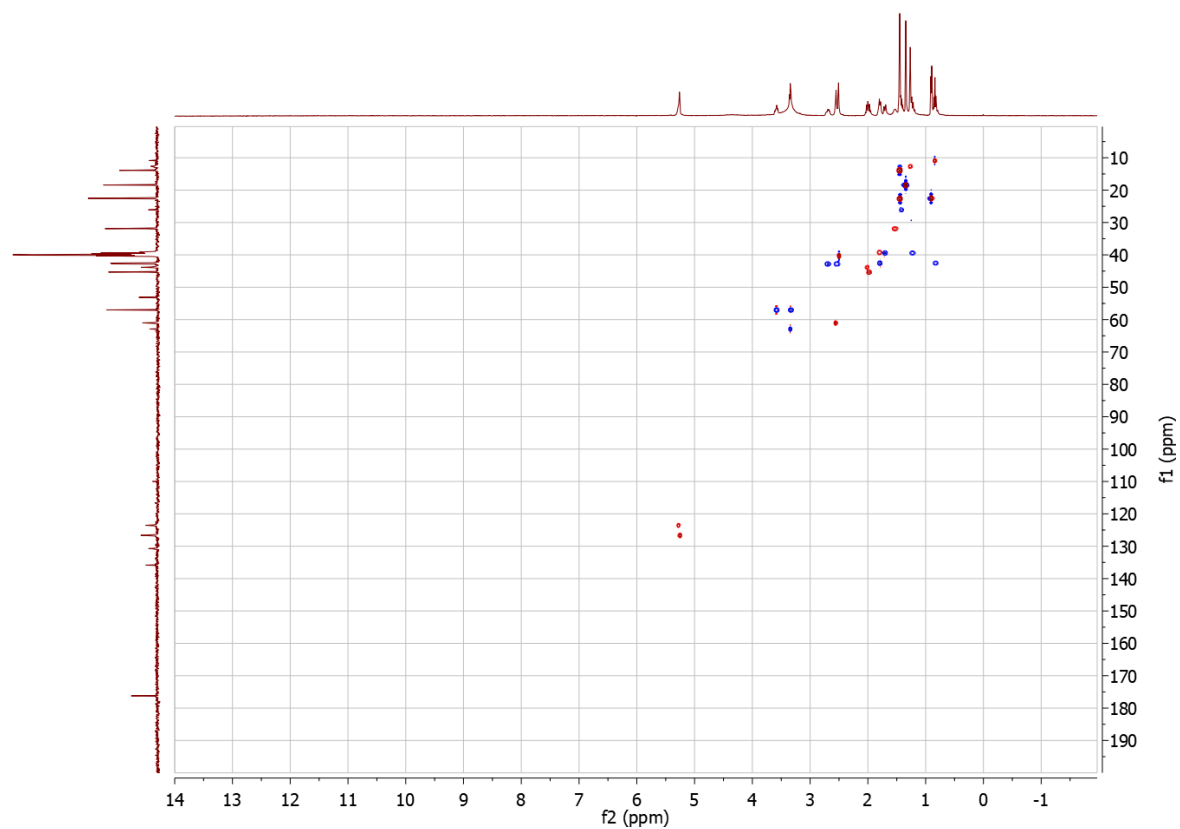

Figure S14. <sup>1</sup>H-<sup>1</sup>H COSY of compound **2** in DMSO-*d*<sub>6</sub>.

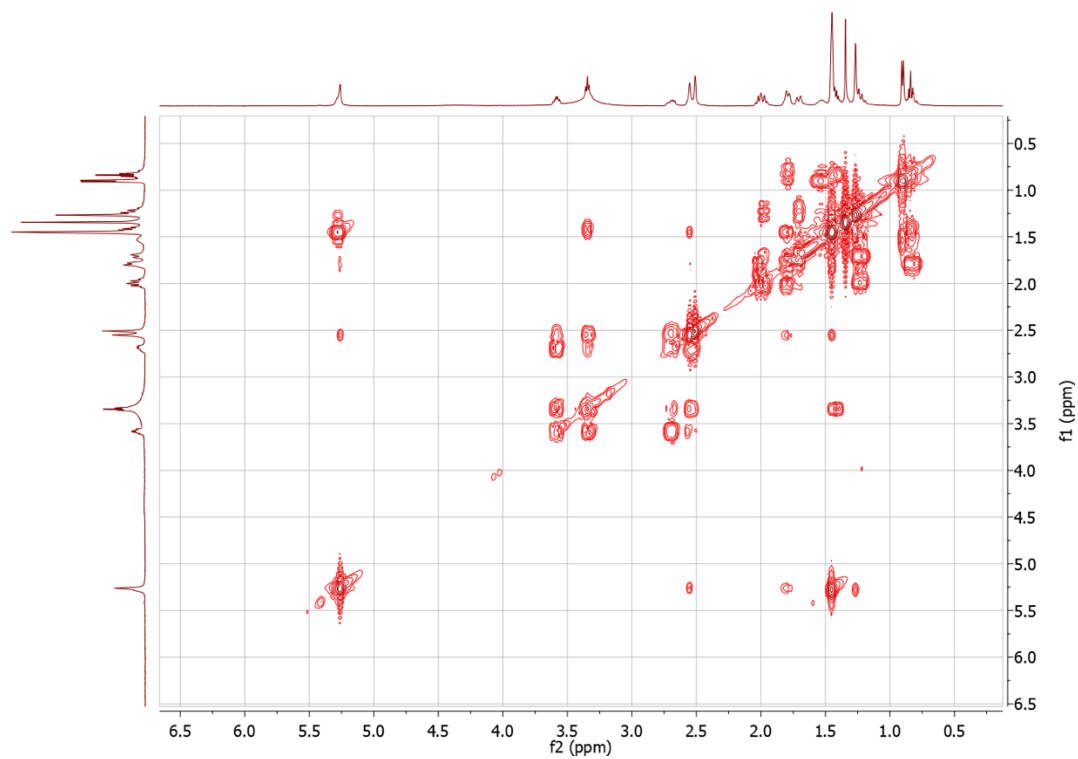

Figure S15. ROESY of compound **2** in DMSO- $d_6$ .

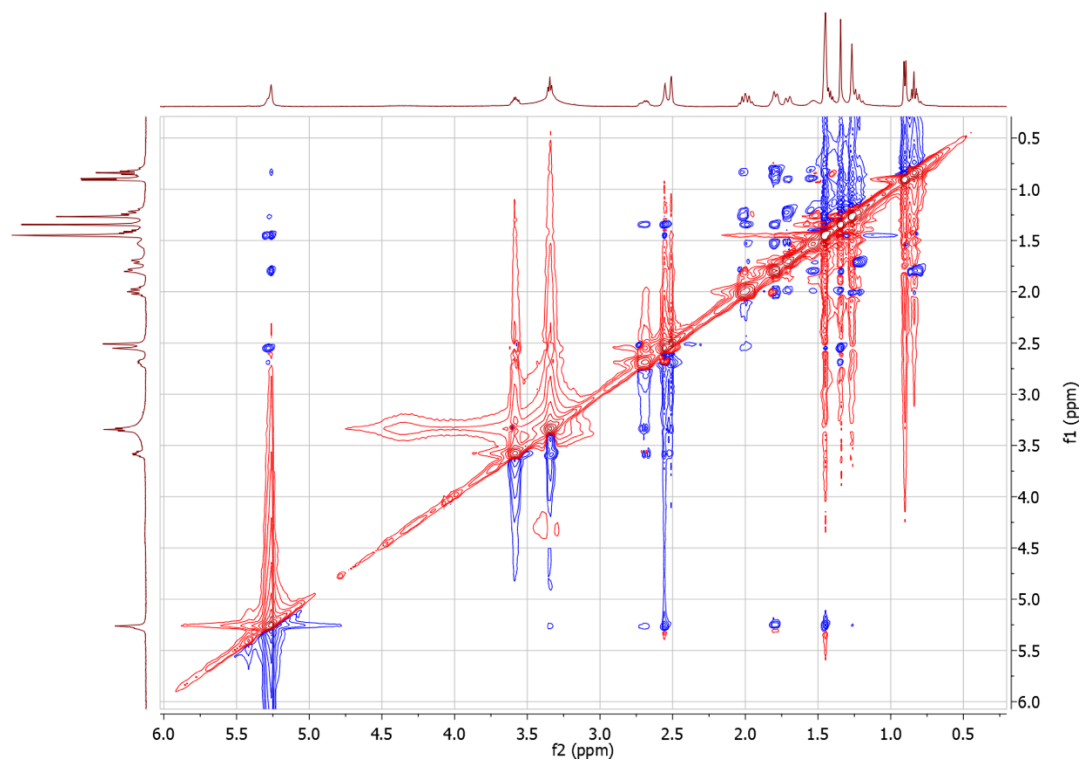

Figure S16.  $^1\text{H}$  NMR of compound **3** in  $\text{CDCl}_3$ .

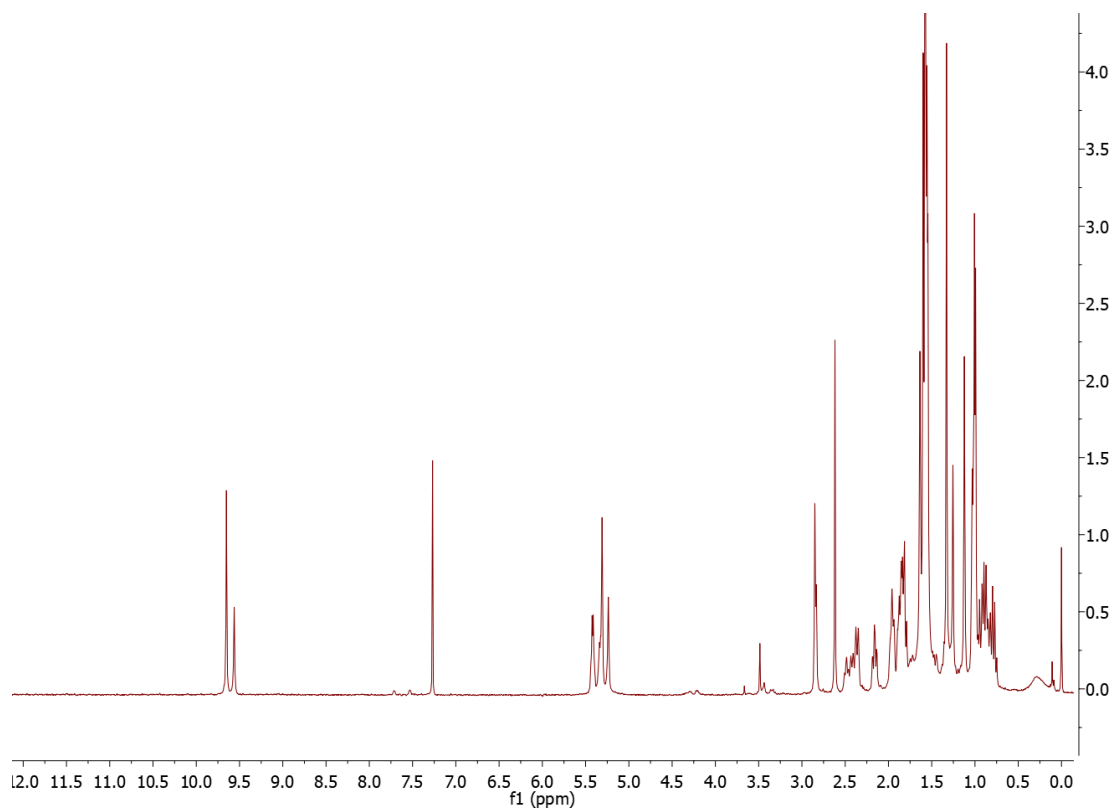

Figure S17.  $^{13}\text{C}$  NMR of compound **3** in  $\text{CDCl}_3$ .

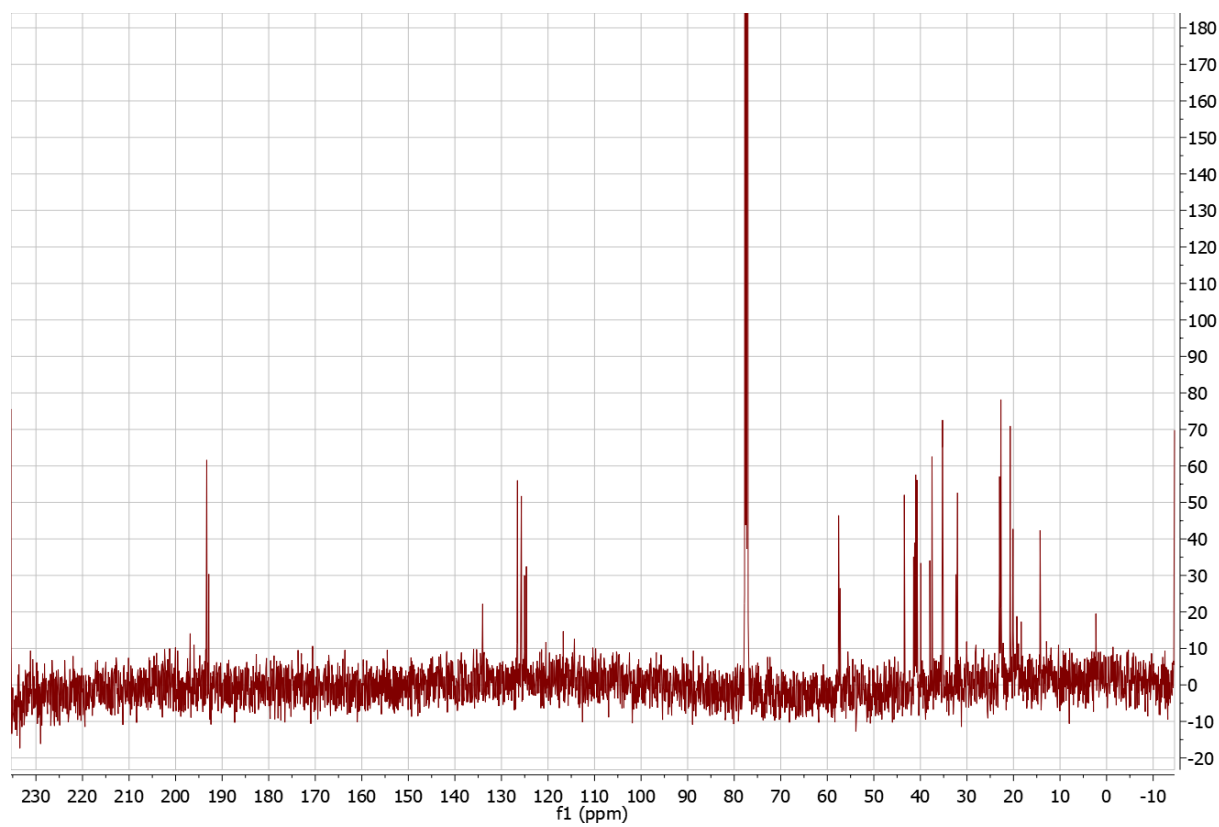

Figure S18. HSQC of compound **3** in  $\text{CDCl}_3$ .

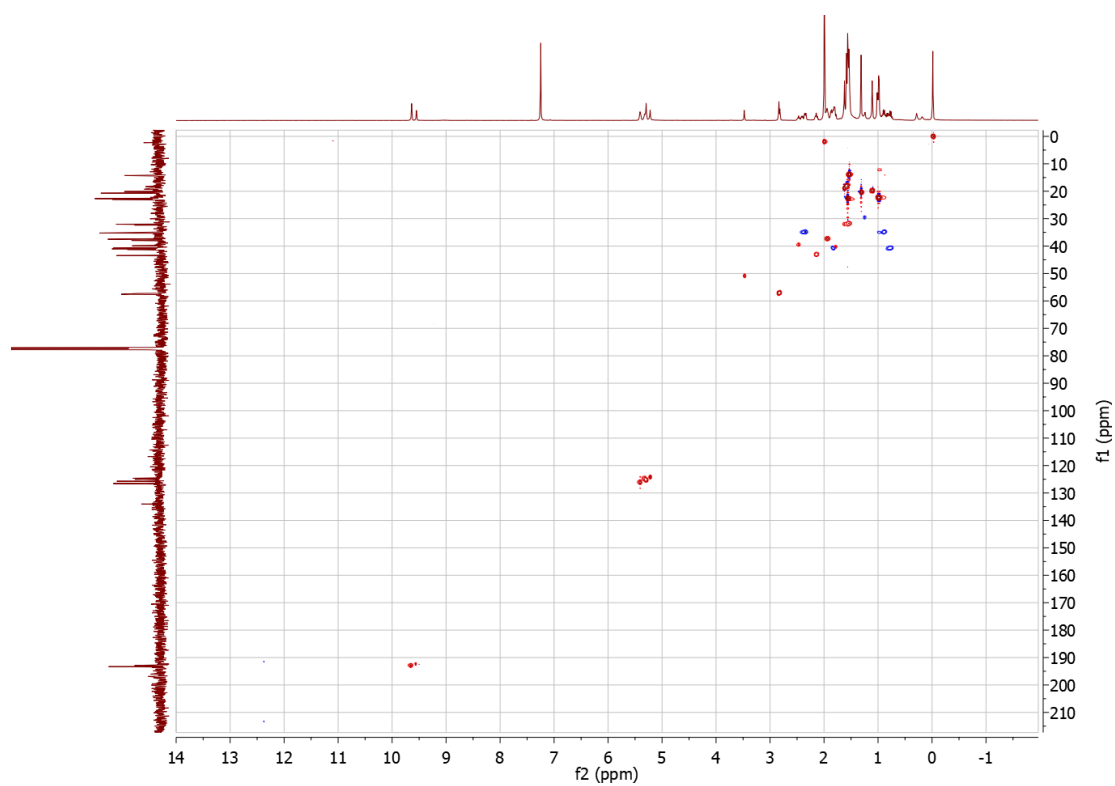

Figure S19. HMBC of compound **3** in CDCl<sub>3</sub>.

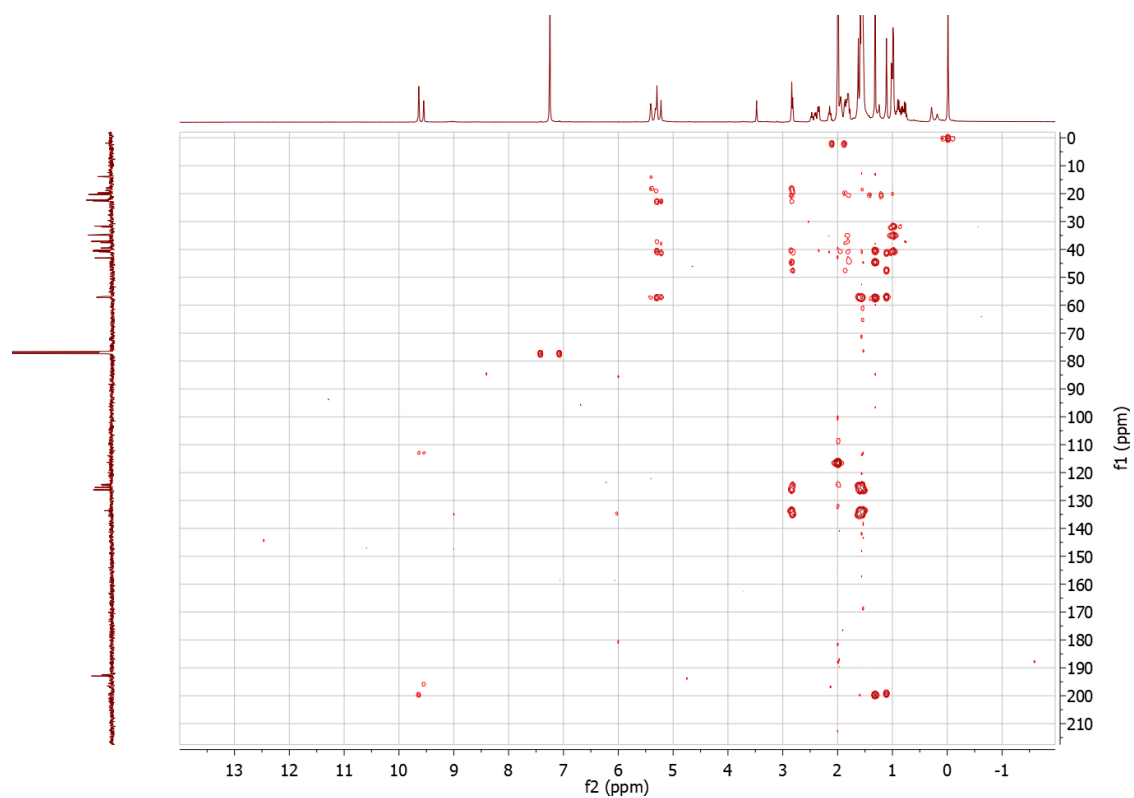

Figure S20. <sup>1</sup>H-<sup>1</sup>H COSY of compound **3** in CDCl<sub>3</sub>.

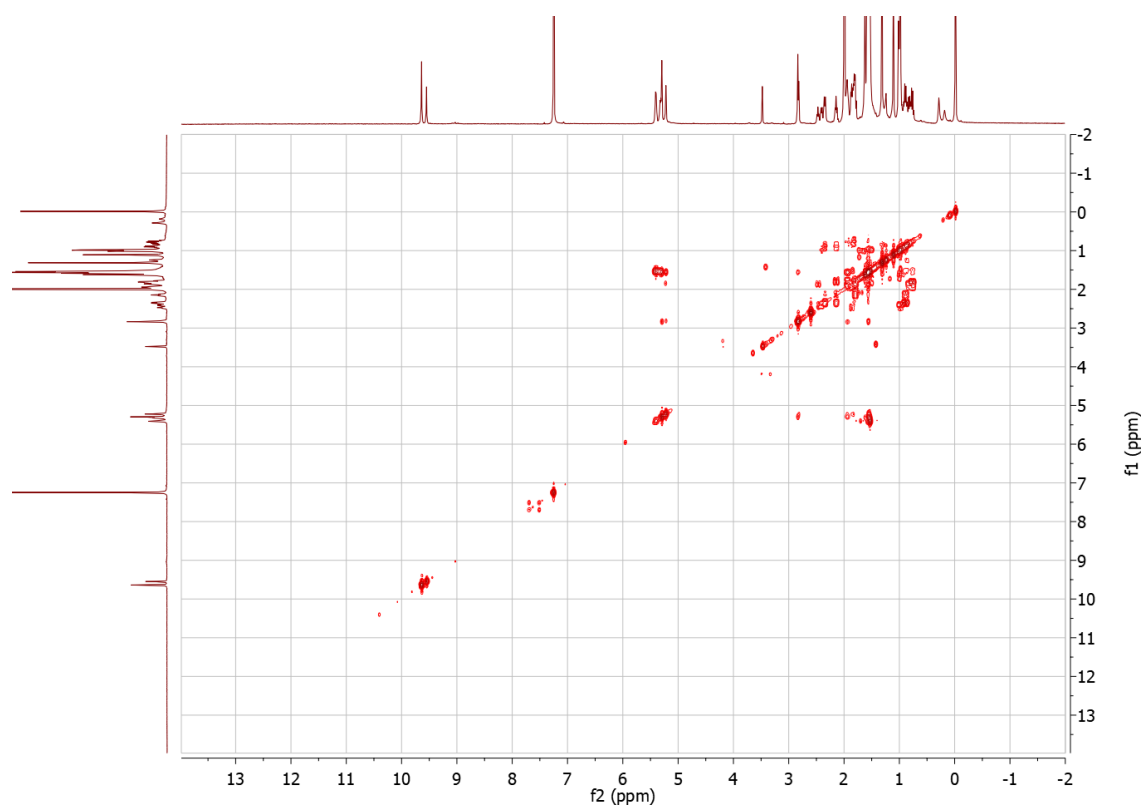

Figure S21. NOESY of compound **3** in CDCl<sub>3</sub>.

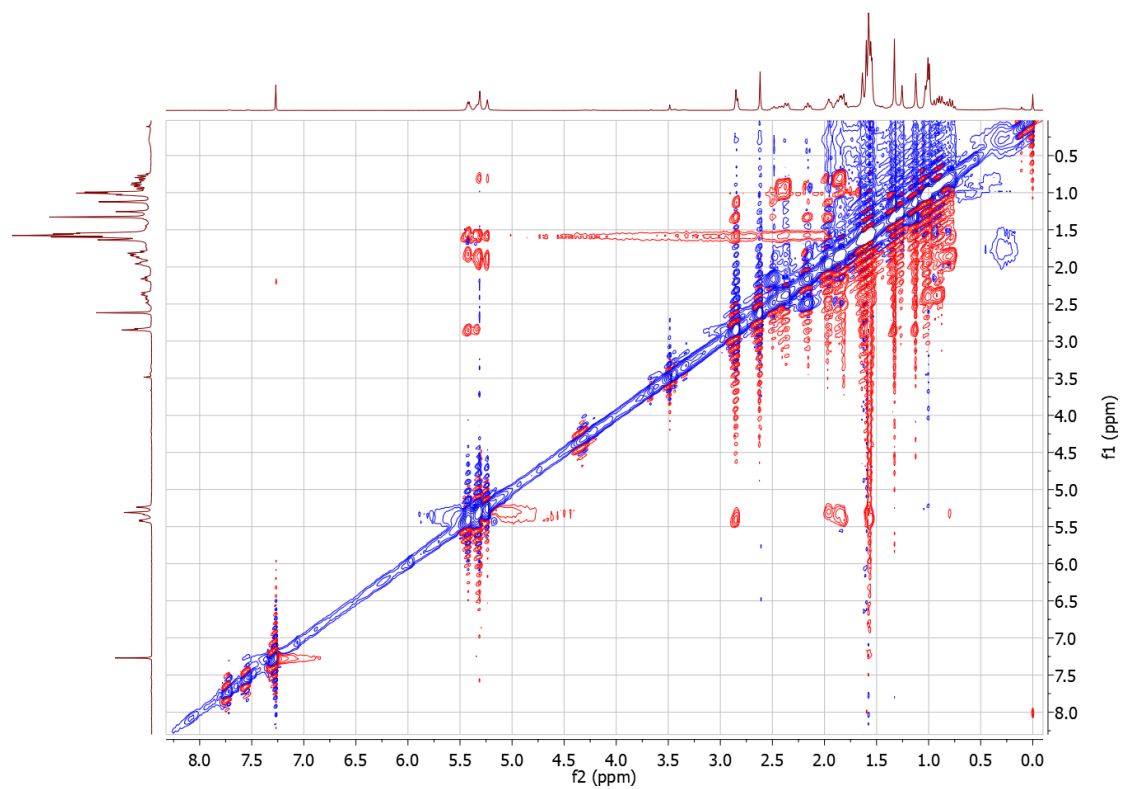

Figure S22. <sup>1</sup>H NMR of compound **4** in CDCl<sub>3</sub>.

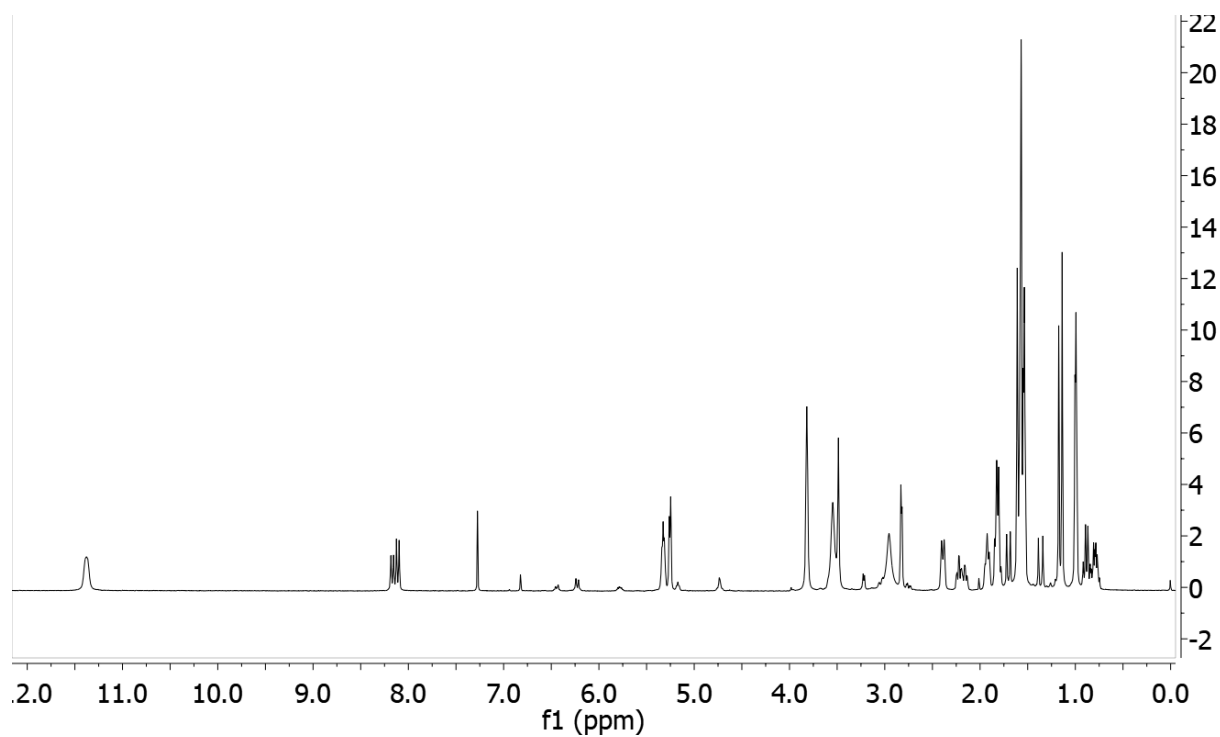

Figure S23.  $^{13}\text{C}$  NMR of compound **4** in  $\text{CDCl}_3$ .

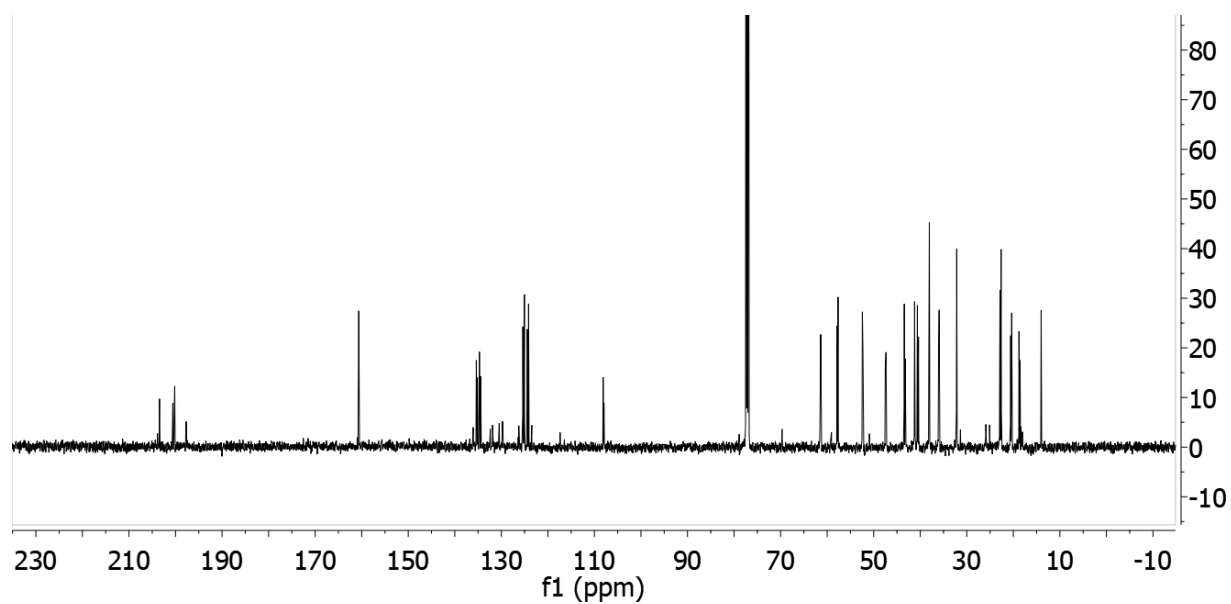

Figure S24. HSQC of compound **4** in  $\text{CDCl}_3$ .

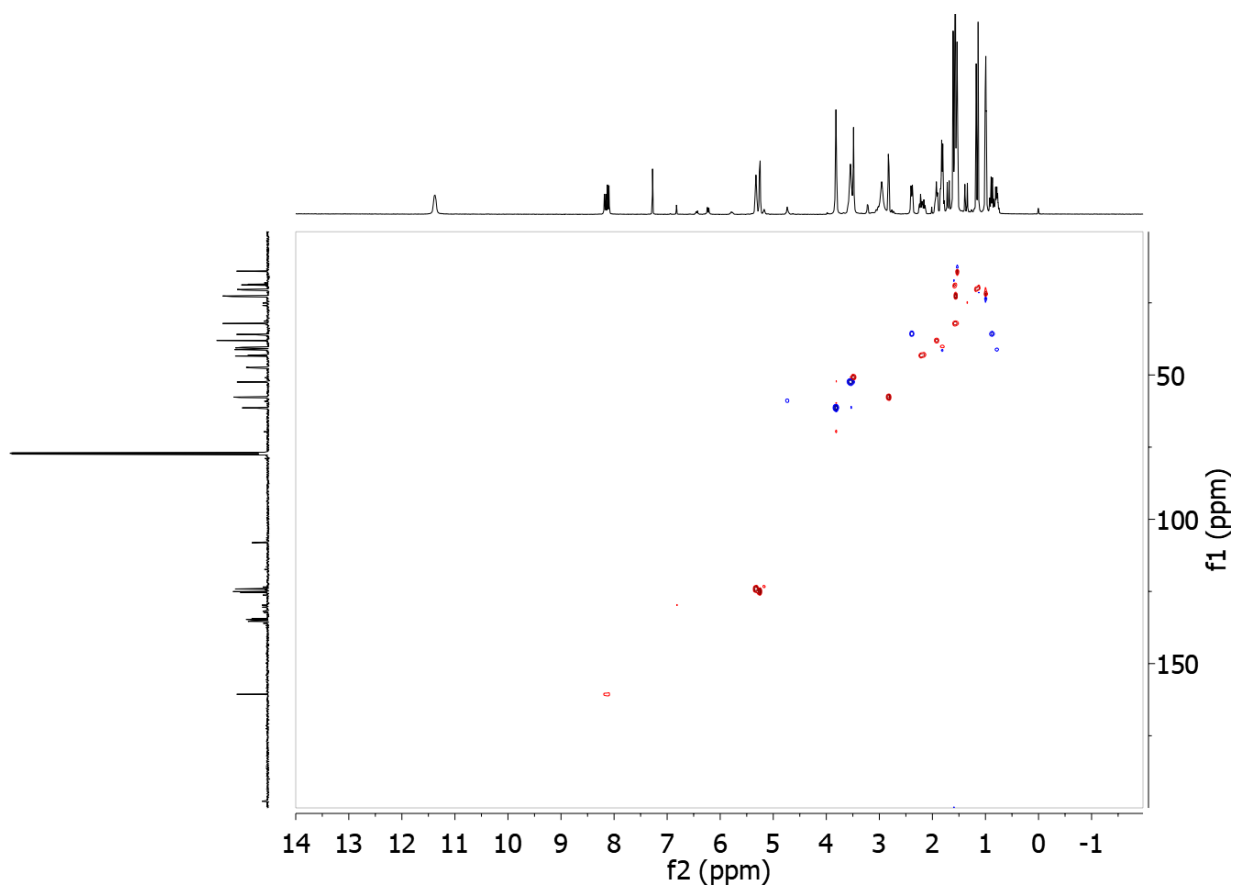

Figure S25. HMBC of compound **4** in CDCl<sub>3</sub>.

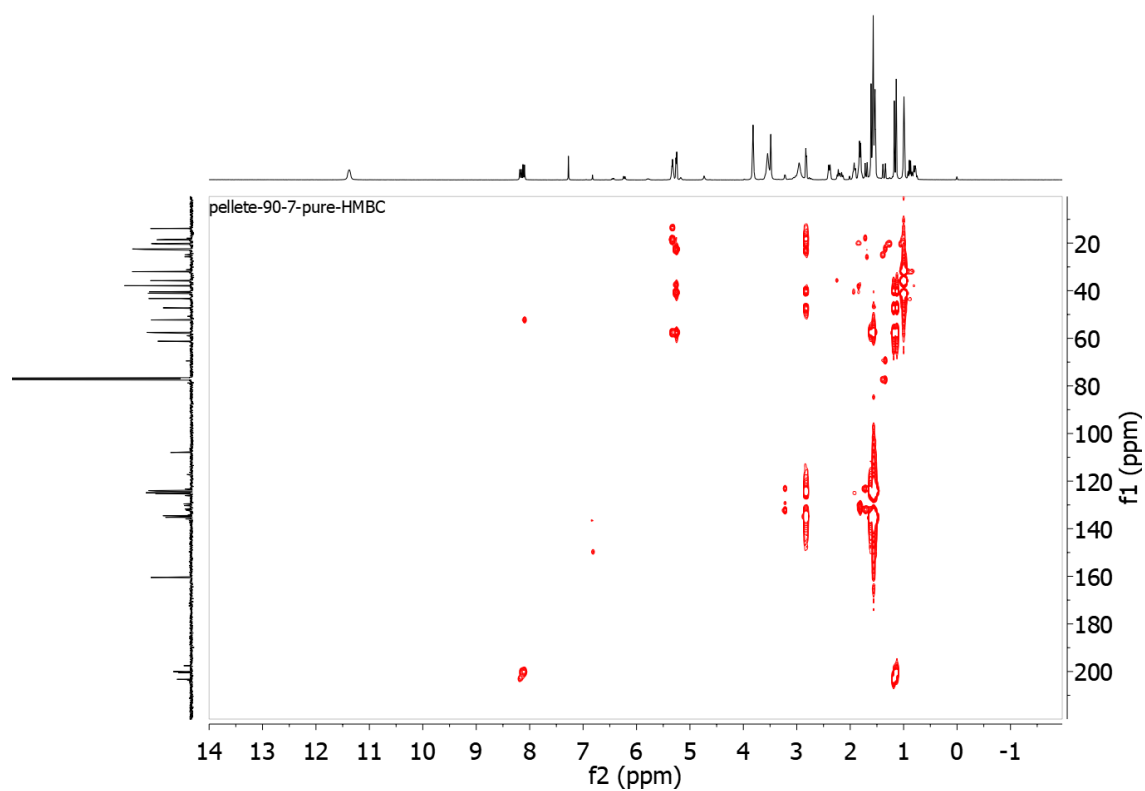

Figure S26. <sup>1</sup>H-<sup>1</sup>H COSY of compound **4** in CDCl<sub>3</sub>.

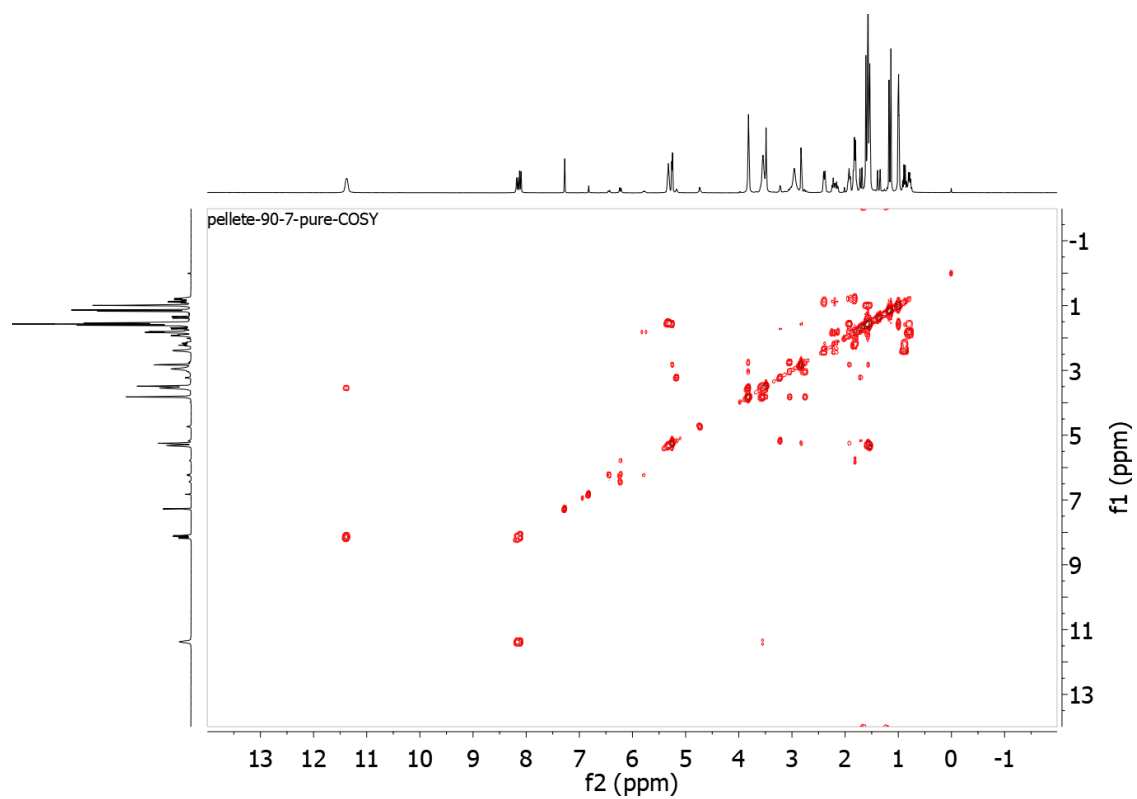



Figure S27. NOESY of compound **4** in CDCl<sub>3</sub>.

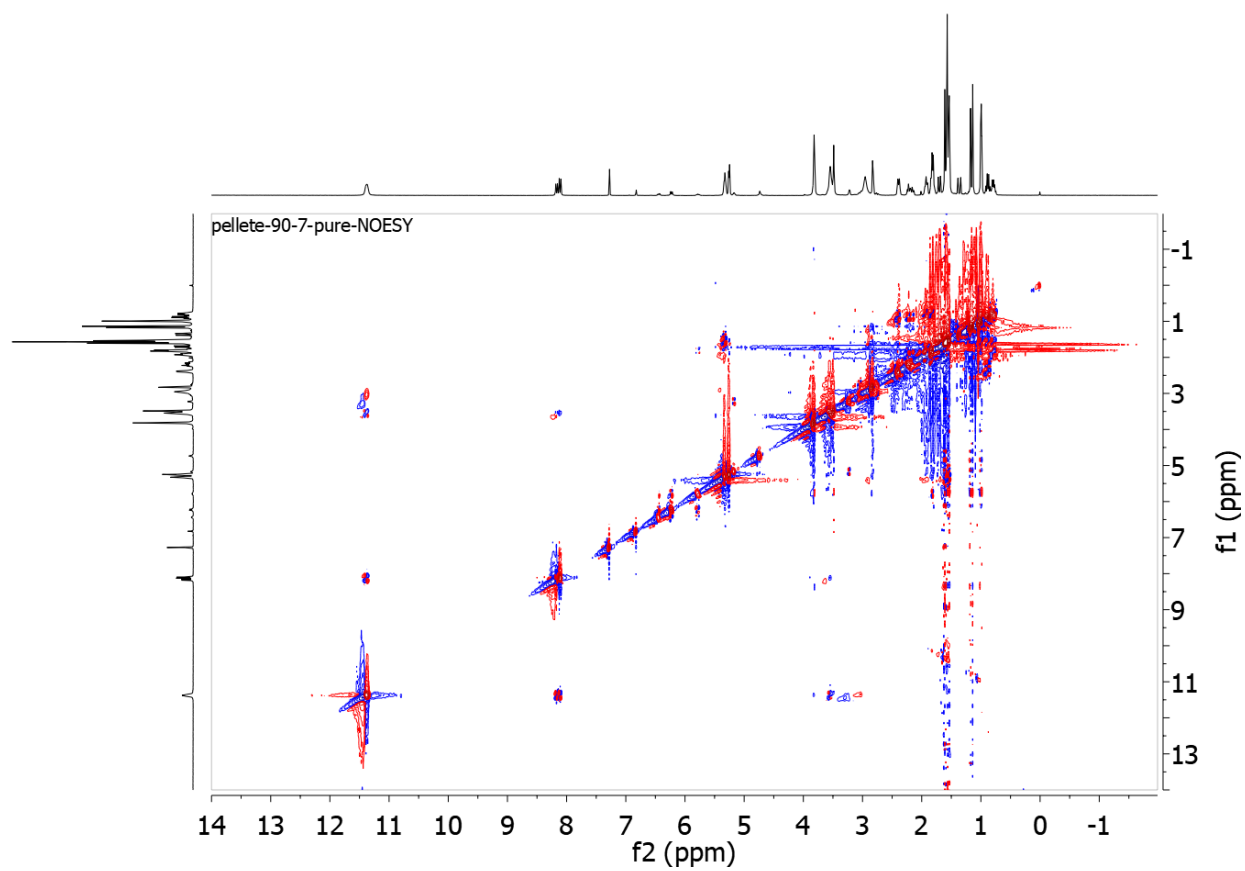

Figure S28. ADEQUATE spectrum of <sup>13</sup>C labeled compound **1**.

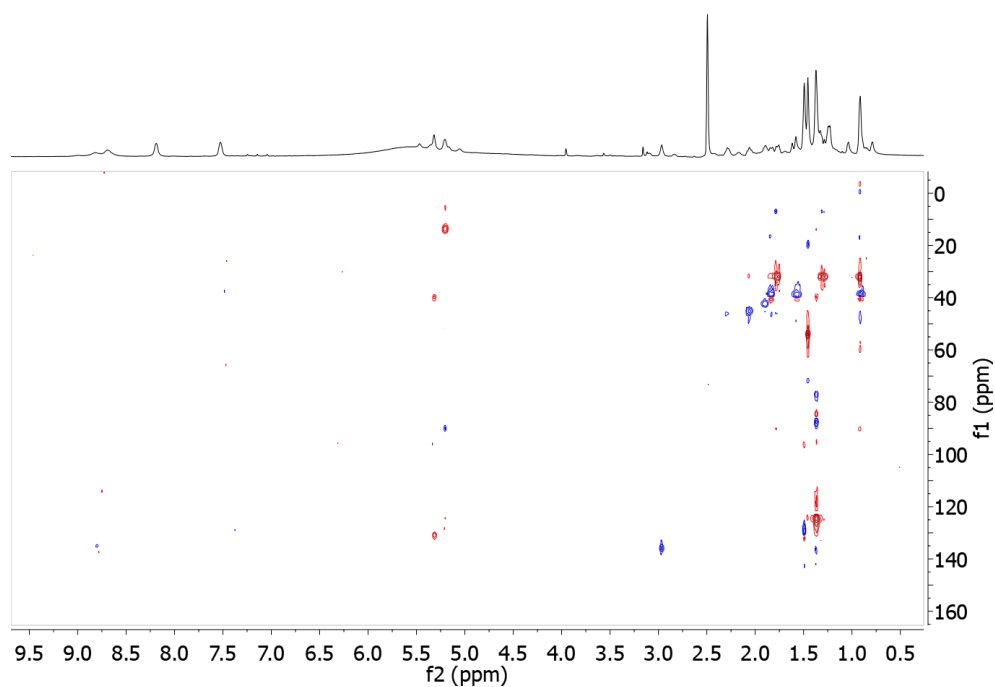

Figure S29. The  $^1\text{H}$  NMR of  $^{13}\text{C}$  labeled and natural compound **1**.

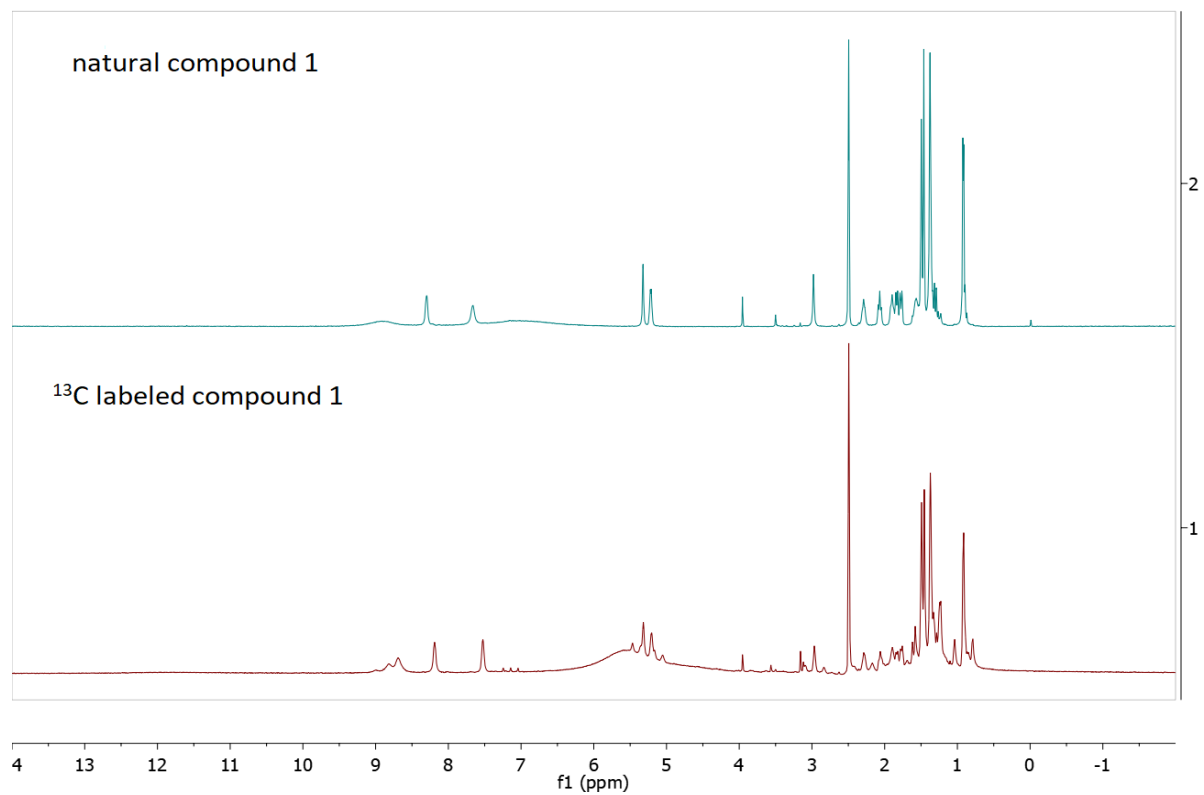

Figure S30. The  $^{13}\text{C}$  NMR of  $^{13}\text{C}$  labeled and natural compound **1**.

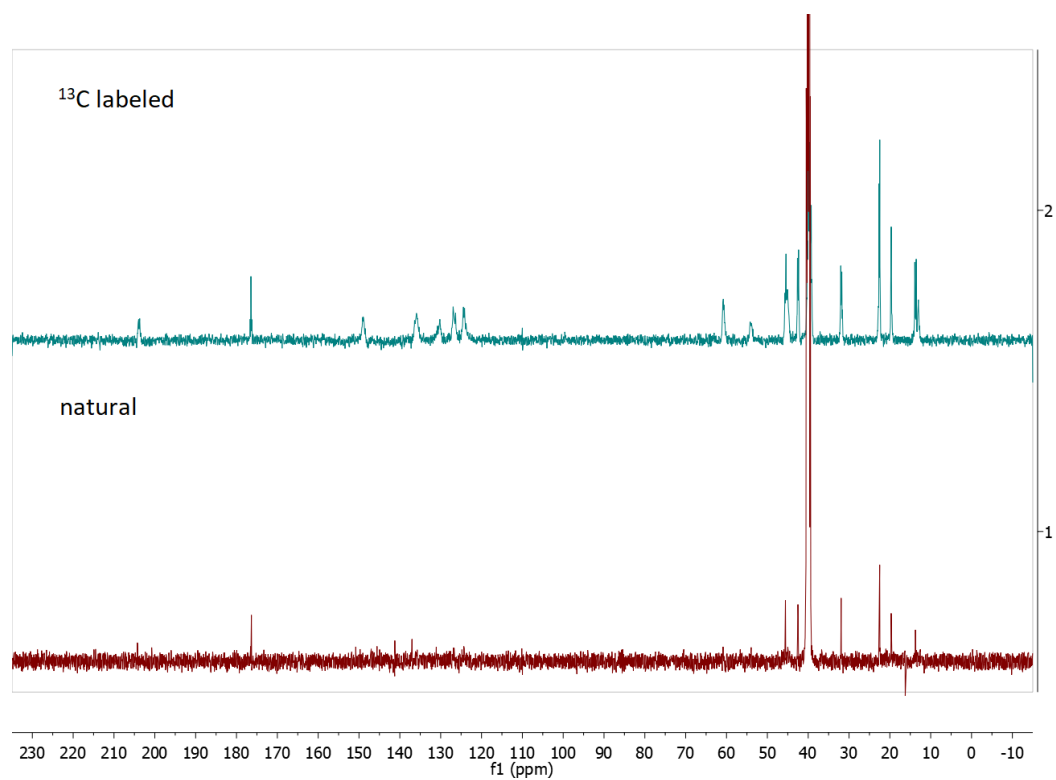

Figure S31. CD spectrum of compound **1**

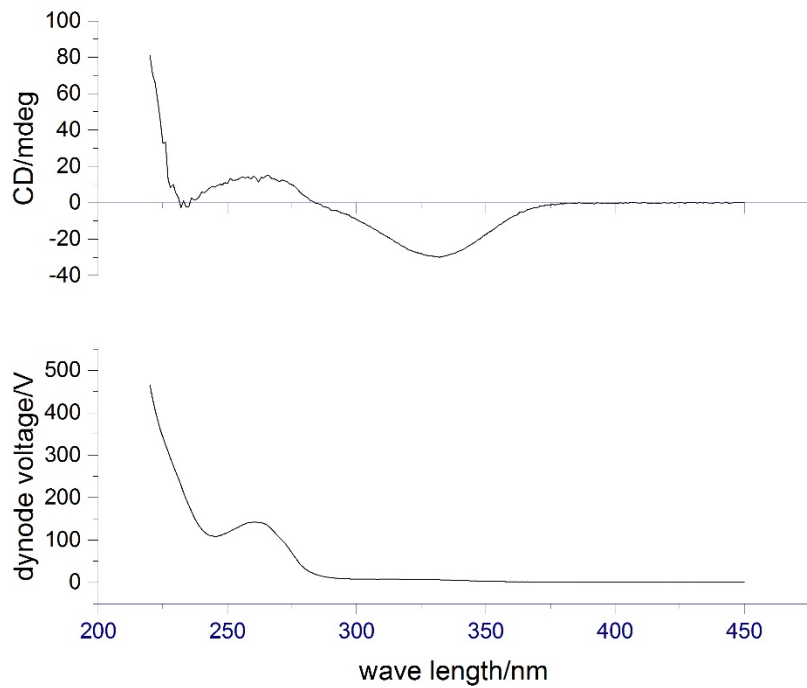

Figure S32. CD spectrum of compound **2**

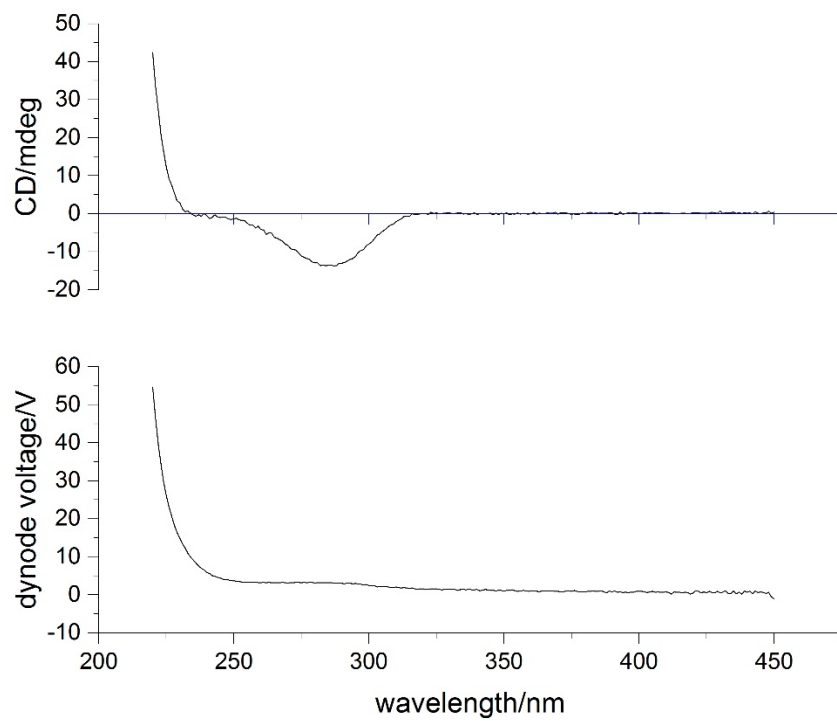

Figure S33. CD spectrum of compound 3

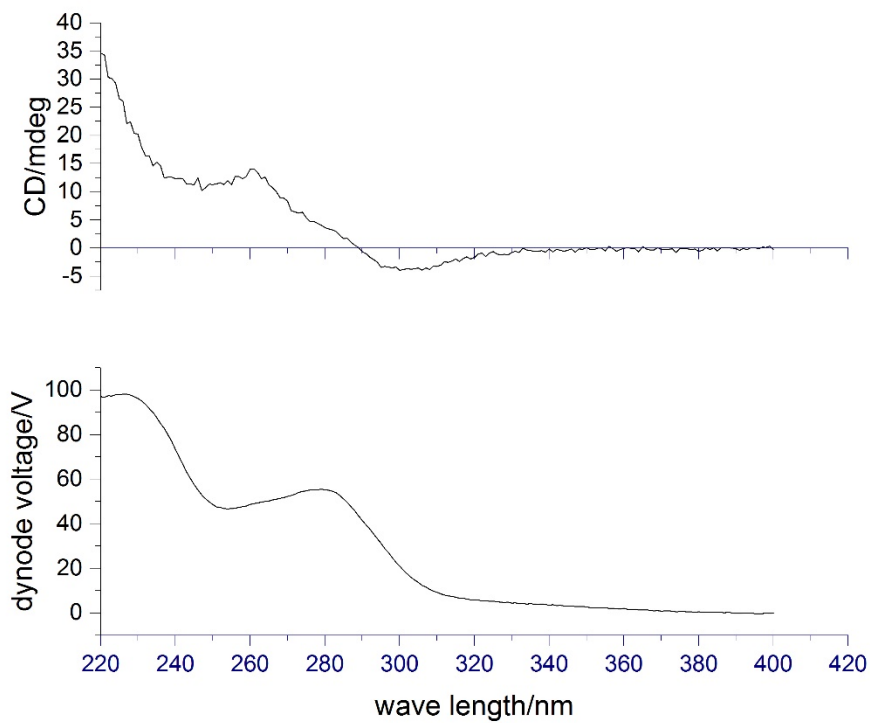

Figure S34. CD spectrum of compound 4

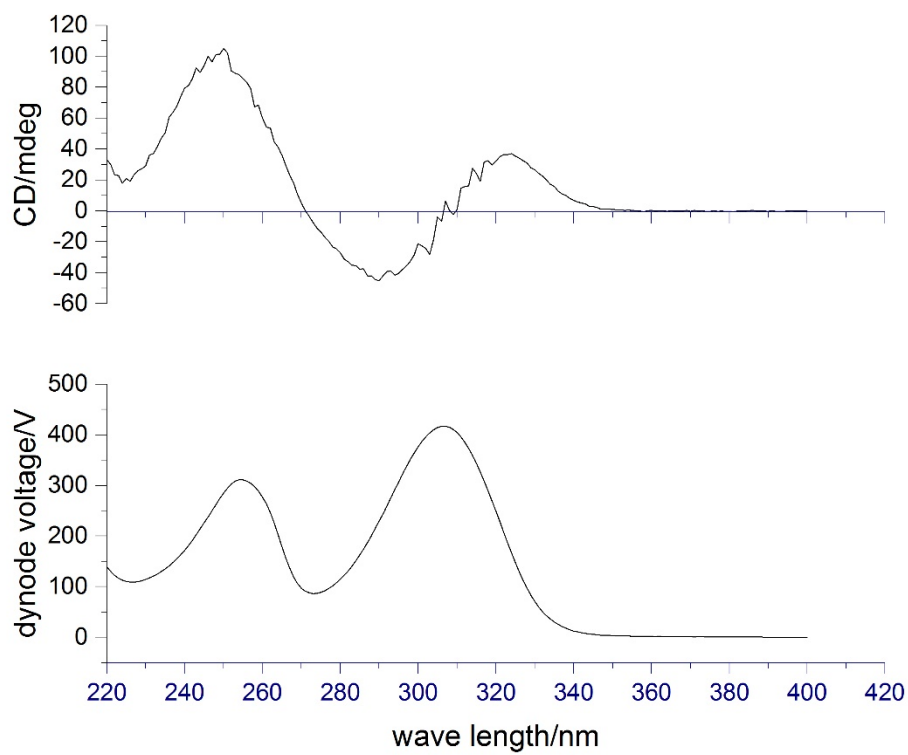

Figure S35. Dose response of TRPV channel inhibition.

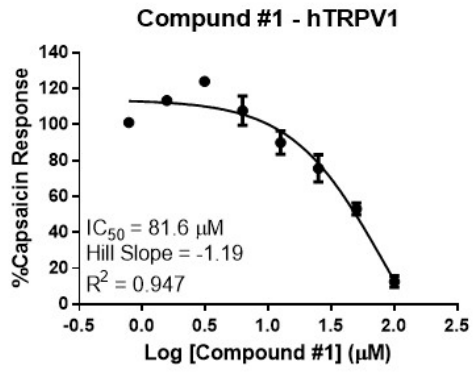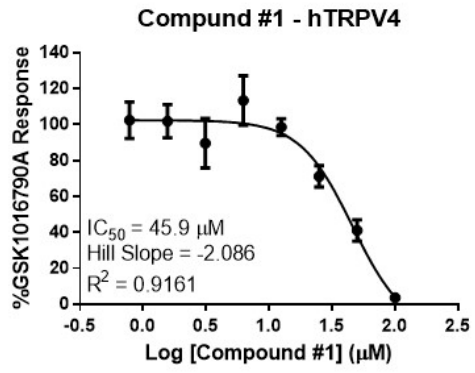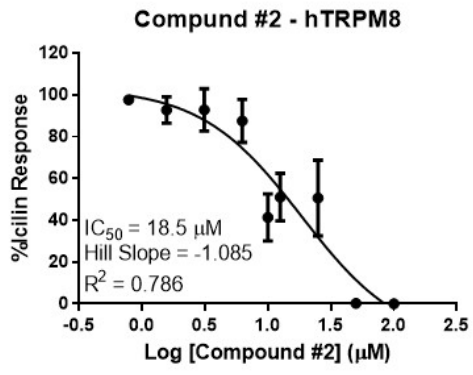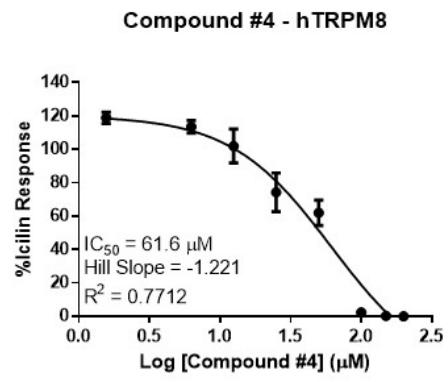

Figure S36. Effects of onydecalins on *H. capsulatum* growth. Itraconazole, amphotericin B, and compounds 3 and 4 were tested for their antifungal properties against *H. capsulatum* at a series of concentrations. Plates were incubated at 37 °C with 5% CO<sub>2</sub> for 10-14 days. The images shown were from the wells containing each compound at the indicated concentration (μg/ml). These experiments were repeated at least three independent times and representative images are shown.

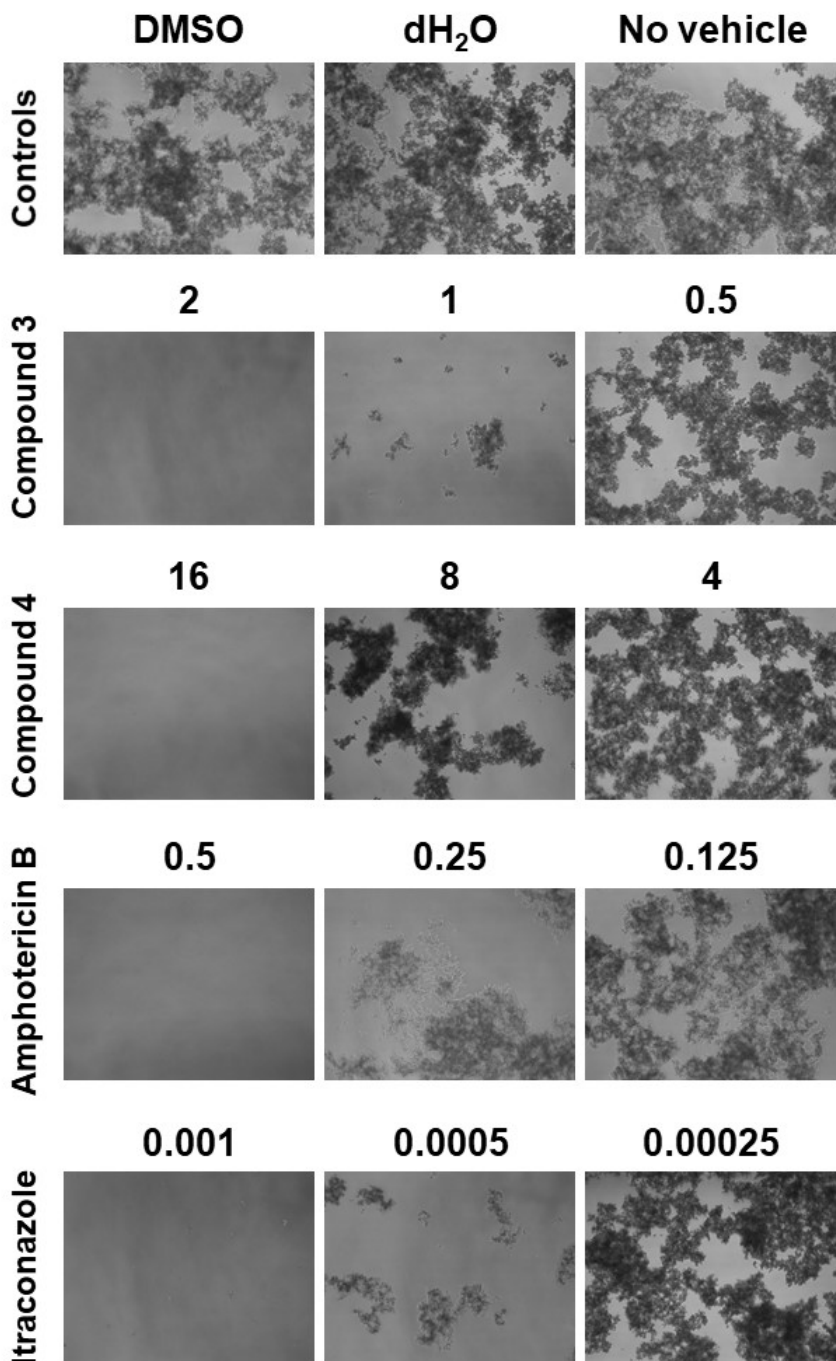

Figure S37. Effects of onydecalsins on fungal growth. Four compounds were tested for their anti-fungal properties at a series of concentrations (0.25 to 64  $\mu\text{g/ml}$ ) against *A. fumigatus* and *C. albicans*. The plates containing *C. albicans* and *A. fumigatus* were incubated for 48 hours at 30 °C and 37 °C, respectively. None of the compounds inhibited the growth of *A. fumigatus* and *C. albicans* at any of the ten concentrations tested. The images shown were from the wells containing the highest (64  $\mu\text{g/ml}$ ) concentration of the respective compound. These experiments were repeated at least three independent times.

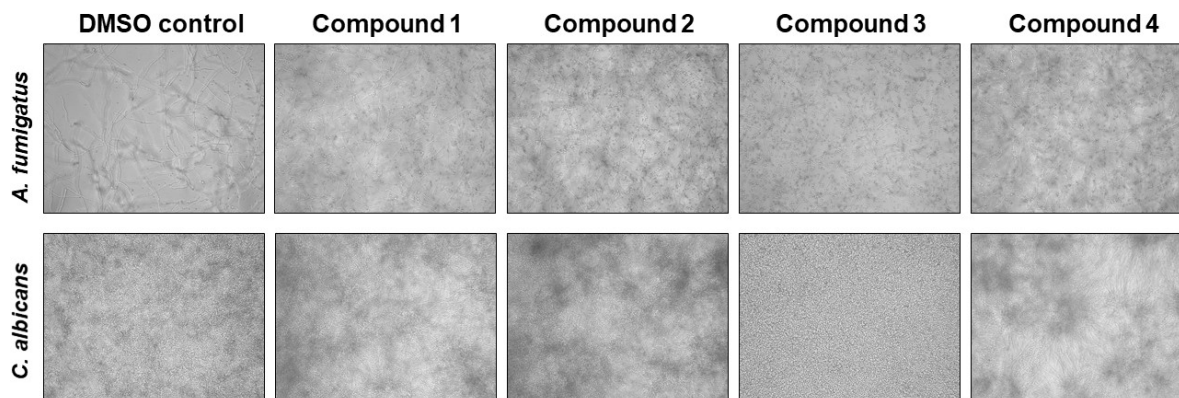

Table S1. Antagonist activity of compounds **1-4** against a panel of TRP channel subtypes ( $\text{IC}_{50}$  values in  $\mu\text{M}^*$ ).

| compound    | TRPA1 | TRPM8 | TRPV1 | TRPV3 | TRPV4 |
|-------------|-------|-------|-------|-------|-------|
| <b>1</b>    | > 100 | > 100 | 81.6  | > 100 | 45.9  |
| <b>2</b>    | > 100 | 18.5  | > 100 | > 100 | > 100 |
| <b>3</b>    | NT    | > 100 | NT    | > 100 | > 100 |
| <b>4</b>    | NT    | 61.6  | NT    | NT    | > 100 |
| capsazepine |       |       | 0.5   |       |       |
| HC-067047   |       |       |       |       | 0.024 |
| AMTB        |       | 5     |       |       |       |

NT=not tested

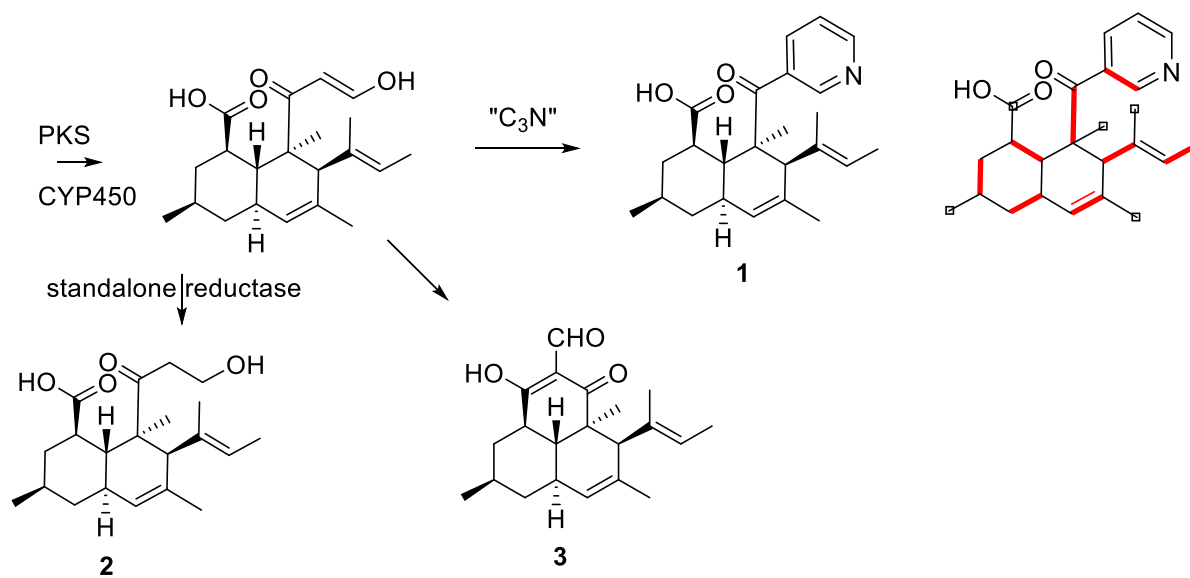

Scheme S1. Proposed biogenesis of compound 1-4. Red:  $^{13}\text{C}$ - $^{13}\text{C}$  coupled carbons resulting from feeding with U- $^{13}\text{C}$ -glucose. Squares:  $^{13}\text{C}$ -enriched carbons resulting from feeding with U- $^{13}\text{C}$ -glucose.
